# Supplementary material for: Identification of Tengfu Jiangya Tablet Target Biomarkers with Quantitative Proteomic Technique
Source: Hindawi journal article supplement (doi:10.1155/2017/7594805), 2017-01-01
Supplement: f1 [file 7594805.f1.pdf]

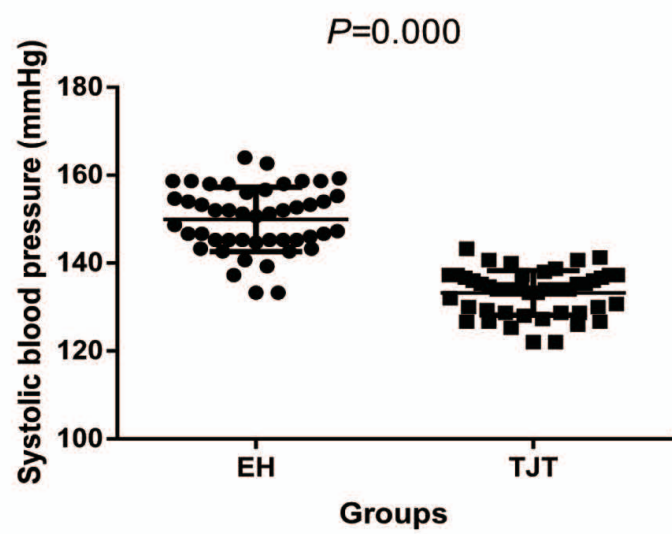

(a)

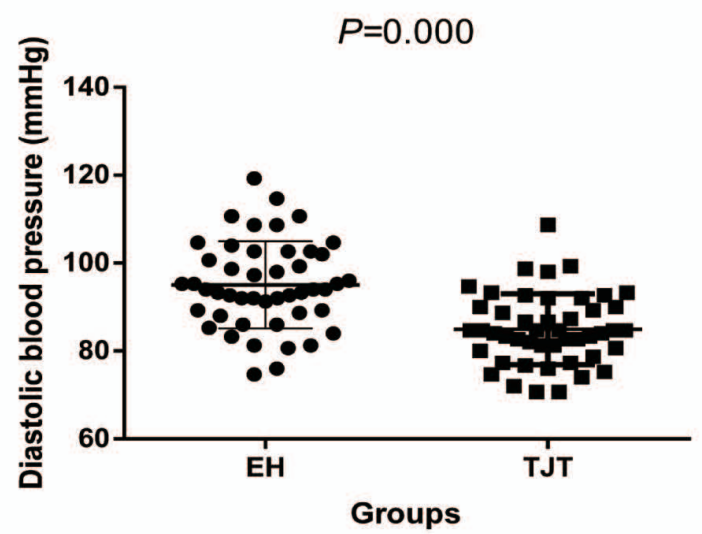

(b)

Supplementary Figure 1

**Supplementary table 1.** The clinical parameters of EH patients between discovery section (n=30) and verification section (n=30).

| Clinical parameters    | Discovery section (n=30) | Verification section (n=30) | <i>P</i> -value    |
|------------------------|--------------------------|-----------------------------|--------------------|
| Age(years)             | 57.1 ± 9.9               | 59.9 ± 9.2                  | 0.946 <sup>a</sup> |
| Sex(♂ / ♀)             | 16/14                    | 14/16                       | 0.606 <sup>b</sup> |
| BMI                    | 25.5 ± 3.0               | 23.7 ± 2.3                  | 0.126 <sup>a</sup> |
| Smoker                 | 14/30                    | 12/30                       | 0.602              |
| Blood pressure of EH   |                          |                             |                    |
| Systolic               | 150.3 ± 8.3              | 149.3 ± 7.1                 | 0.618 <sup>a</sup> |
| Diastolic              | 95.0 ± 11.3              | 95.0 ± 8.3                  | 1.000 <sup>a</sup> |
| Blood pressure of TJJT |                          |                             |                    |
| Systolic               | 133.1 ± 5.4              | 132.2 ± 5.1                 | 0.512 <sup>a</sup> |
| Diastolic              | 84.6 ± 9.2               | 84.9 ± 6.5                  | 0.889 <sup>a</sup> |

Data were expressed as Mean±SD; a) *P*- value between two experiment sections with independent samples T-test; b) Chi-square Test,  $P \leq 0.05$  was considered to be statistically significant. In additional, the blood pressures between EH and TJJT groups were also statistically analyzed by Spss16.0 with Paired-sample T-test, both of the systolic and diastolic blood pressure were significantly different before and after TJJT treatment ( $P=0.000$ ).

\*A total of 47 EH individuals were involved in our study. Firstly, 30 patients were selected in the discovery section randomly. Secondly, the remaining 17 patients and 13 patients involved in the first section were jointly analyzed in verification section.

\*BMI=Weight (Kg)/Height<sup>2</sup>(m<sup>2</sup>)

# supplementary table2. A list of identified and quantified proteins by iTRAQ proteomics

| Hits | Accession                      | Description                                        | Mass   | Seq      | Score | Cov  | SameSets | Spectrum | Unique | Spei | Peptide | Unique | Pept  | A-VS-B@R | A-VS-B@R |
|------|--------------------------------|----------------------------------------------------|--------|----------|-------|------|----------|----------|--------|------|---------|--------|-------|----------|----------|
| 1    | tr B0YJC6 B0YJC6_HUMAN         | Vitamin K-dependent protein Z variant 1 OS=Hom     | 53450  | MAGCVPL  | 31    | 2.9  | 1        | 1        | 1      | 1    | 1       | 1      | 1     | ---      | ---      |
| 2    | tr Q7Z7Q0 Q7Z7Q0_HUMAN         | Apob protein OS=Homo sapiens GN=Apob PE=           | 113702 | MDPPRPA  | 5835  | 45.5 | -        | 588      | 1      | 39   | 1       | 1      | ---   | ---      | ---      |
| 3    | sp P35908 K22E_HUMAN           | Keratin, type II cytoskeletal 2 epidermal OS=Hom   | 76630  | MSCQISC  | 275   | 15.5 | -        | 23       | 13     | 10   | 8       | 0.608  | 0.607 |          |          |
| 4    | tr B4DNG0 B4DNG0_HUMAN         | Olfactomedin-like protein 3 OS=Homo sapiens GN     | 44167  | MLPLLEF  | 40    | 5.8  | 1        | 4        | 4      | 2    | 2       | ---    | ---   | ---      | ---      |
| 5    | sp P23412 FBLN1_HUMAN          | Fibulin-1 OS=Homo sapiens GN=FBLN1 PE=1 S'         | 86744  | MERAAPS  | 851   | 28.3 | -        | 87       | 60     | 17   | 8       | 1.115  | 1.048 |          |          |
| 6    | tr L0R4T3 L0R4T3_HUMAN         | Histone H2B OS=Homo sapiens GN=ABCF2 PE=           | 8880   | MSIMNSF  | 32    | 13.4 | 20       | 4        | 4      | 1    | 1       | ---    | ---   | ---      | ---      |
| 7    | tr C9JF17 C9JF17_HUMAN         | Apolipoprotein D (Fragment) OS=Homo sapiens G      | 28800  | MFKQLSC  | 857   | 28.8 | 1        | 84       | 84     | 6    | 6       | 0.834  | 0.781 |          |          |
| 8    | sp P18428 LBP_HUMAN            | Lipopolysaccharide-binding protein OS=Homo sap     | 60518  | MGALARA  | 2335  | 20.2 | -        | 145      | 145    | 9    | 9       | 0.794  | 0.784 |          |          |
| 9    | tr B2RMS9 B2RMS9_HUMAN         | Inter-alpha (Globulin) inhibitor H4 (Plasma Kallik | 116303 | MKPPRPV  | 3903  | 25.2 | 1        | 263      | 263    | 21   | 21      | 1.114  | 1.097 |          |          |
| 10   | sp P03950 ANGI_HUMAN           | Angiogenin OS=Homo sapiens GN=ANG PE=1 S'          | 19315  | MYMGLG   | 40    | 26.5 | -        | 9        | 9      | 4    | 4       | 0.78   | 0.697 |          |          |
| 11   | tr Q0PW96 Q0PW96_HUMAN         | Intersectin 1 short form variant 7 OS=Homo sapien  | 157455 | MAQFPPT  | 25    | 0.7  | 10       | 1        | 1      | 1    | 1       | ---    | ---   | ---      | ---      |
| 12   | tr L0R8K6 L0R8K6_HUMAN         | Alternative protein TRIM25 OS=Homo sapiens G       | 9186   | MWSLEVI  | 21    | 13.6 | -        | 3        | 3      | 1    | 1       | ---    | ---   | ---      | ---      |
| 13   | tr B3KRN4 B3KRN4_HUMAN         | cDNA FLJ34625 fis, clone KIDNE2015244, highl       | 57113  | MGWAAR   | 45    | 5.6  | 2        | 3        | 3      | 2    | 2       | 0.831  | 0.903 |          |          |
| 14   | sp P01608 KV116_HUMAN          | Ig kappa chain V-I region Roy OS=Homo sapiens I    | 14018  | DIQMTQSI | 137   | 24.1 | -        | 11       | 6      | 2    | 1       | ---    | ---   | ---      | ---      |
| 15   | tr B7Z7R8 B7Z7R8_HUMAN         | cDNA FLJ55622, highly similar to Multimerin-1 C    | 133624 | MQHKIVT  | 301   | 10.9 | 2        | 24       | 24     | 10   | 10      | 1.033  | 0.938 |          |          |
| 16   | sp P00739 HPTK_HUMAN           | Haptoglobin-related protein OS=Homo sapiens GN     | 48340  | MSDLGAV  | 677   | 36.2 | -        | 72       | 22     | 11   | 4       | 0.676  | 0.704 |          |          |
| 17   | tr B4DEB9 B4DEB9_HUMAN         | cDNA FLJ61099, highly similar to ADP-ribosylati    | 23649  | MGNIFAN  | 29    | 5.8  | 7        | 1        | 1      | 1    | 1       | ---    | ---   | ---      | ---      |
| 18   | sp Q13790 APOF_HUMAN           | Apolipoprotein F OS=Homo sapiens GN=APOF P         | 39065  | MTGLCGY  | 45    | 8.3  | -        | 3        | 3      | 2    | 2       | ---    | ---   | ---      | ---      |
| 19   | tr Q6IB71 Q6IB71_HUMAN         | Proteasome subunit alpha type OS=Homo sapiens C    | 34405  | MSSIGTG  | 81    | 25.5 | 1        | 2        | 2      | 1    | 1       | 1.029  | 1.096 |          |          |
| 20   | tr Q6ZNX5 Q6ZNX5_HUMAN         | CDNA FLJ26936 fis, clone RCT06808 OS=Homo          | 18632  | MAWALLI  | 41    | 4.8  | -        | 2        | 2      | 1    | 1       | ---    | ---   | ---      | ---      |
| 21   | tr Q5CZ94 Q5CZ94_HUMAN         | Putative uncharacterized protein DKFZp781M038      | 29340  | MAWTPLF  | 708   | 30.8 | -        | 75       | 2      | 6    | 1       | ---    | ---   | ---      | ---      |
| 22   | tr A0A087WTS5 A0A087WTS5_HUMAN | Ig kappa chain C region OS=Homo sapiens GN=IC      | 30209  | MDMRVP   | 1394  | 44.1 | -        | 155      | 1      | 7    | 1       | ---    | ---   | ---      | ---      |
| 23   | tr A2MYC8 A2MYC8_HUMAN         | V5-2 protein (Fragment) OS=Homo sapiens GN=V       | 12669  | QPVLTQPI | 50    | 28.8 | 1        | 6        | 6      | 3    | 3       | ---    | ---   | ---      | ---      |
| 24   | tr G3V2W1 G3V2W1_HUMAN         | Protein Z-dependent protease inhibitor OS=Homo     | 65592  | MSRSTQE  | 346   | 15.1 | 1        | 33       | 3      | 8    | 1       | 1.054  | 0.935 |          |          |
| 25   | sp P19652 A1AG2_HUMAN          | Alpha-1-acid glycoprotein 2 OS=Homo sapiens G      | 28132  | MALSWVI  | 61    | 9.5  | -        | 7        | 7      | 2    | 2       | 0.897  | 0.763 |          |          |
| 26   | tr D6RF35 D6RF35_HUMAN         | Vitamin D-binding protein OS=Homo sapiens GN=      | 67663  | MKRVLVL  | 55    | 18.5 | 1        | 17       | 17     | 9    | 9       | 1.692  | 1.092 |          |          |
| 27   | tr K7ER19 K7ER19_HUMAN         | Truncated apolipoprotein C-I (Fragment) OS=Hom     | 11075  | MRLFLSL  | 409   | 32.5 | 1        | 51       | 51     | 3    | 3       | 0.739  | 0.71  |          |          |
| 28   | sp O76076 WISP2_HUMAN          | WNT1-inducible-signaling pathway protein 2 OS=     | 29677  | MRGTPKT  | 35    | 4    | -        | 2        | 2      | 1    | 1       | ---    | ---   | ---      | ---      |
| 29   | tr Q1L857 Q1L857_HUMAN         | Ceruloplasmin (Fragment) OS=Homo sapiens PE=       | 136274 | MKILLIGI | 862   | 16.7 | 3        | 82       | 82     | 13   | 13      | 1.059  | 1.013 |          |          |
| 30   | tr Q9UL89 Q9UL89_HUMAN         | Myosin-reactive immunoglobulin heavy chain vari    | 14841  | VQSGAEV  | 62    | 10.3 | 1        | 1        | 1      | 1    | 1       | ---    | ---   | ---      | ---      |
| 31   | tr Q5SRP5 Q5SRP5_HUMAN         | Apolipoprotein M OS=Homo sapiens GN=APOM           | 17751  | MAAGSAP  | 61    | 17.8 | 1        | 11       | 11     | 3    | 3       | 0.669  | 0.73  |          |          |
| 32   | tr B3KRFP B3KRFP_HUMAN         | cDNA FLJ34156 fis, clone FCBBF3013266, highl       | 35578  | MPWPLLF  | 124   | 7.2  | 1        | 8        | 8      | 2    | 2       | 0.946  | 0.878 |          |          |
| 33   | tr H0Y7V6 H0Y7V6_HUMAN         | Pulmonary surfactant-associated protein B (Fragm   | 46516  | XHLQLWI  | 24    | 4.3  | 5        | 1        | 1      | 1    | 1       | ---    | ---   | ---      | ---      |
| 34   | tr Q7Z351 Q7Z351_HUMAN         | Putative uncharacterized protein DKFZp686N022      | 63846  | MEFLQWT  | 3561  | 29.9 | -        | 309      | 2      | 11   | 1       | ---    | ---   | ---      | ---      |
| 35   | sp Q15113 PCOC1_HUMAN          | Procollagen C-endopeptidase enhancer 1 OS=Hom      | 55490  | MLPAATA  | 347   | 28.1 | -        | 40       | 40     | 11   | 11      | 1.08   | 1.092 |          |          |
| 36   | tr A0A068LKR7 A0A068LKR7_HUMAN | Ig heavy chain variable region (Fragment) OS=Hom   | 15875  | QVQLVES  | 102   | 32.8 | 1        | 10       | 3      | 3    | 1       | 1.055  | 0.94  |          |          |
| 37   | tr F8VV32 F8VV32_HUMAN         | Lysozyme C OS=Homo sapiens GN=LYZ PE=1 S           | 13895  | MKALIVL  | 163   | 23.1 | 1        | 12       | 12     | 2    | 2       | 1.512  | 1.505 |          |          |
| 38   | sp Q6U7Y4 ATL4_HUMAN           | ADAMTS-like protein 4 OS=Homo sapiens GN=A         | 123181 | MENWTLG  | 64    | 3.8  | 1        | 3        | 3      | 3    | 3       | 0.878  | 0.978 |          |          |
| 39   | tr Q8TAN2 Q8TAN2_HUMAN         | Frizzled homolog 9 (Drosophila) OS=Homo sapien     | 71986  | MAVAPTR  | 31    | 1.7  | 1        | 9        | 9      | 1    | 1       | ---    | ---   | ---      | ---      |
| 40   | sp P34096 RNA54_HUMAN          | Ribonuclease 4 OS=Homo sapiens GN=RNASE4           | 19111  | MALQRTA  | 49    | 18.4 | -        | 5        | 5      | 2    | 2       | 1.505  | 0.764 |          |          |
| 41   | tr B2R984 B2R984_HUMAN         | cDNA, FLJ94268, highly similar to Homo sapiens     | 41045  | MSETAPA  | 48    | 8.2  | 5        | 2        | 2      | 2    | 2       | ---    | ---   | ---      | ---      |
| 42   | sp Q86UD1 Q86UD1_HUMAN         | Out at first protein homolog OS=Homo sapiens GN    | 35194  | MRLPGVP  | 90    | 3.3  | -        | 11       | 11     | 1    | 1       | 1.119  | 1.026 |          |          |
| 43   | sp P02741 CRP_HUMAN            | C-reactive protein OS=Homo sapiens GN=CRP PE       | 29757  | MEKLLCF  | 309   | 23.7 | -        | 59       | 59     | 6    | 6       | 1.125  | 1.098 |          |          |
| 44   | sp P80108 PHLD_HUMAN           | Phosphatidylinositol-glycan-specific phospholipase | 103248 | MSAFLWF  | 206   | 11.1 | -        | 18       | 18     | 8    | 8       | 1.146  | 1.04  |          |          |
| 45   | tr A0A075B7C3 A0A075B7C3_HUMAN | C-C motif chemokine 5 (Fragment) OS=Homo sapi      | 19150  | XAALAVII | 23    | 5.3  | 2        | 2        | 2      | 1    | 1       | ---    | ---   | ---      | ---      |
| 46   | tr F1C4A7 F1C4A7_HUMAN         | Monocyte differentiation antigen CD14 OS=Homo      | 43702  | MERASCL  | 185   | 19.2 | 2        | 18       | 18     | 6    | 6       | 0.594  | 0.483 |          |          |
| 47   | tr S6C4Q9 S6C4Q9_HUMAN         | IgG L chain OS=Homo sapiens PE=2 SV=1              | 26779  | MAWALLI  | 1176  | 24   | -        | 134      | 2      | 5    | 1       | ---    | ---   | ---      | ---      |
| 48   | tr A5PLK9 A5PLK9_HUMAN         | Metalloendopeptidase OS=Homo sapiens GN=BM         | 131159 | MPGVARI  | 78    | 1.9  | 2        | 4        | 4      | 2    | 2       | 0.963  | 1.105 |          |          |
| 49   | tr B3KRVP B3KRVP_HUMAN         | cDNA FLJ34967 fis, clone NTONG2004690, high        | 63225  | MESKALL  | 89    | 10.8 | 4        | 8        | 8      | 5    | 5       | 1.056  | 1.014 |          |          |
| 50   | sp Q14520 HABP2_HUMAN          | Hyaluronan-binding protein 2 OS=Homo sapiens C     | 76908  | MFARMSE  | 160   | 10.2 | -        | 34       | 34     | 6    | 6       | 1.19   | 1.1   |          |          |
| 51   | tr Q5VY30 Q5VY30_HUMAN         | Retinol binding protein 4, plasma, isoform CRA_b   | 26952  | MNYSKIP  | 63    | 15.1 | 1        | 7        | 7      | 3    | 3       | 2.028  | 1.684 |          |          |
| 52   | tr Q9NSD0 Q9NSD0_HUMAN         | Protein S OS=Homo sapiens PE=2 SV=1                | 89278  | MSKQQA   | 489   | 16.3 | 2        | 60       | 60     | 12   | 12      | 1.181  | 1.13  |          |          |
| 53   | sp P20160 CAP7_HUMAN           | Azurocidin OS=Homo sapiens GN=AZU1 PE=1 S          | 27933  | MTRLTVL  | 123   | 8    | -        | 8        | 8      | 2    | 2       | 1.254  | 1.791 |          |          |
| 54   | tr A0N8J8 A0N8J8_HUMAN         | V lambda B (Fragment) OS=Homo sapiens PE=4 SV      | 13760  | MAWTPLF  | 57    | 21.6 | 2        | 11       | 2      | 3    | 1       | ---    | ---   | ---      | ---      |
| 55   | tr Q6PIK1 Q6PIK1_HUMAN         | IGL @ protein OS=Homo sapiens GN=IGL @ PE=         | 29690  | MAWALLI  | 816   | 34   | -        | 95       | 4      | 7    | 1       | ---    | ---   | ---      | ---      |
| 56   | tr B4E1T8 B4E1T8_HUMAN         | cDNA FLJ151452, highly similar to Lysyl oxidase I  | 51776  | MALARTS  | 28    | 4.6  | 1        | 1        | 1      | 1    | 1       | ---    | ---   | ---      | ---      |
| 57   | sp P35579 MYH9_HUMAN           | Myosin-9 OS=Homo sapiens GN=MYH9 PE=1 S'           | 290921 | MAQQAAI  | 34    | 1.4  | -        | 4        | 2      | 3    | 2       | ---    | ---   | ---      | ---      |
| 58   | sp P02533 K1C14_HUMAN          | Keratin, type I cytoskeletal 14 OS=Homo sapiens C  | 59172  | MTTCSRC  | 50    | 4.4  | 1        | 2        | 1      | 2    | 1       | ---    | ---   | ---      | ---      |
| 59   | sp Q15166 PON3_HUMAN           | Serum paraoxonase/lactonase 3 OS=Homo sapiens      | 46199  | MGLKVAI  | 183   | 14.7 | -        | 39       | 39     | 5    | 5       | 1.026  | 0.971 |          |          |
| 60   | tr B3KML9 B3KML9_HUMAN         | cDNA FLJ11352 fis, clone HEMBA1000020, high        | 49175  | MRENVHL  | 52    | 10.1 | 16       | 4        | 4      | 3    | 3       | ---    | ---   | ---      | ---      |
| 61   | tr H0Y512 H0Y512_HUMAN         | Adipocyte plasma membrane-associated protein (F    | 50834  | XVVTDD   | 169   | 8.6  | 1        | 14       | 14     | 3    | 3       | 0.922  | 0.865 |          |          |
| 62   | tr U3KPS2 U3KPS2_HUMAN         | Myeloblastin OS=Homo sapiens GN=PRTN3 PE=          | 25269  | MASLQMF  | 42    | 5.6  | 2        | 2        | 2      | 1    | 1       | ---    | ---   | ---      | ---      |
| 63   | tr B2RBW9 B2RBW9_HUMAN         | cDNA, FLJ95746, highly similar to Homo sapiens     | 41072  | MTSSLLT  | 90    | 5.1  | 1        | 13       | 13     | 2    | 2       | 0.832  | 0.786 |          |          |
| 64   | tr A0A068LL62 A0A068LL62_HUMAN | Ig heavy chain variable region (Fragment) OS=Hom   | 14698  | QVQLQQV  | 40    | 12.7 | -        | 6        | 2      | 2    | 1       | ---    | ---   | ---      | ---      |
| 65   | tr H0YK48 H0YK48_HUMAN         | Tropomyosin alpha-1 chain OS=Homo sapiens GN       | 36225  | MAGSSSL  | 52    | 9.7  | 5        | 3        | 1      | 2    | 1       | ---    | ---   | ---      | ---      |
| 66   | tr B7Z4X6 B7Z4X6_HUMAN         | cDNA FLJ51012, highly similar to Plasminogen ac    | 43747  | MLQLTTG  | 40    | 14.9 | -        | 12       | 12     | 5    | 5       | 1.167  | 1.24  |          |          |
| 67   | sp P01009 A1AT_HUMAN           | Alpha-1-antitrypsin OS=Homo sapiens GN=SERP        | 57525  | MPSSWSC  | 610   | 29.2 | -        | 47       | 47     | 11   | 11      | 0.877  | 0.901 |          |          |
| 68   | sp P08294 SODE_HUMAN           | Extracellular superoxide dismutase [Cu-Zn] OS=H    | 28116  | MLALLCS  | 390   | 25.8 | -        | 19       | 19     | 4    | 4       | 1.044  | 1.053 |          |          |
| 69   | tr Q6U2E7 Q6U2E7_HUMAN         | C4B1 (Fragment) OS=Homo sapiens GN=C4B PE          | 6651   | VSAGSPHI | 291   | 80.3 | -        | 45       | 1      | 3    | 1       | ---    | ---   | ---      | ---      |
| 70   | tr A2RRB2 A2RRB2_HUMAN         | ZNF608 protein OS=Homo sapiens GN=ZNF608 I         | 57576  | MSVNSTP  | 25    | 2    | 3        | 2        | 2      | 1    | 1       | ---    | ---   | ---      | ---      |
| 71   | sp P04180 LCAT_HUMAN           | Phosphatidylcholine-sterol acyltransferase OS=H    | 53843  | MGPPGSP  | 341   | 14.8 | -        | 35       | 35     | 6    | 6       | 0.988  | 1.027 |          |          |
| 72   | tr J3KRPO J3KRPO_HUMAN         | Beta-Ala-His dipeptidase OS=Homo sapiens GN=A      | 59295  | MDPKLGR  | 122   | 15.5 | 2        | 12       | 12     | 8    | 8       | 1.078  | 1.127 |          |          |
| 73   | tr J3KQ60 J3KQ60_HUMAN         | Reelin OS=Homo sapiens GN=RELN PE=4 SV=1           | 428795 | MERSGVR  | 39    | 0.7  | 1        | 4        | 4      | 3    | 3       | ---    | ---   | ---      | ---      |
| 74   | tr Q9HCC1 Q9HCC1_HUMAN         | Single chain Fv (Fragment) OS=Homo sapiens PE=     | 13566  | EVQLVES  | 64    | 36.6 | -        | 9        | 2      | 3    | 1       | ---    | ---   | ---      | ---      |
| 75   | tr B7ZIF8 B7ZIF8_HUMAN         | cDNA FLJ53025, highly similar to Complement C      | 36015  | MCPEDES  | 8244  | 56.7 | -        | 678      | 64     | 14   | 2       | 1.052  | 1.046 |          |          |
| 76   | sp P20851 C4BPA_HUMAN          | C4b-binding protein beta chain OS=Homo sapiens     | 35088  | MFFWCAC  | 477   | 21.8 | -        | 43       | 43     | 5    | 5       | 0.841  | 0.783 |          |          |
| 77   | tr Q9UL70 Q9UL70_HUMAN         | Myosin-reactive immunoglobulin light chain variat  | 13869  | DIQMTQSI | 123   | 23.1 | -        | 6        | 1      | 2    | 1       | ---    | ---   | ---      | ---      |
| 78   | sp Q02985 FHR3_HUMAN           | Complement factor H-related protein 3 OS=Homo      | 44580  | MLLLINVI | 81    | 14.5 | -        | 11       | 10     | 5    | 4       | 1.233  | 1.352 |          |          |
| 79   | tr A8K6C1 A8K6C1_HUMAN         | cDNA FLJ76868, highly similar to Homo sapiens      | 63358  | MLAATVL  | 447   | 10.8 | 1        | 41       | 41     | 6    | 6       | 0.721  | 0.829 |          |          |
| 80   | tr B3KS79 B3KS79_HUMAN         | cDNA FLJ35730 fis, clone TESTI2003131, highl       | 59285  | MKIHYSR  | 136   | 9.8  | 1        | 11       | 11     | 4    | 4       | 1.034  | 0.889 |          |          |
| 81   | sp P01137 TGFB1_HUMAN          | Transforming growth factor beta-1 OS=Homo sapi     | 50777  | MPPSGLR  | 52    | 8.7  | -        | 7        | 7      | 4    | 4       | 0.822  | 0.9   |          |          |
| 82   | tr B5MCZ9 B5MCZ9_HUMAN         | Glutaminyl-peptide cyclotransferase (Fragment) O   | 35244  | MAGGRHI  | 31    | 4.9  | 1        | 2        | 2      | 1    | 1       | ---    | ---   | ---      | ---      |
| 83   | tr D6REX5 D6REX5_HUMAN         | Selenoprotein P (Fragment) OS=Homo sapiens GN      | 42698  | MWRSLGI  | 165   | 12.6 | 1        | 9        | 9      | 4    | 4       | 0.731  | 0.894 |          |          |
| 84   | tr B2R7Z6 B2R7Z6_HUMAN         | cDNA, FLJ93674 OS=Homo sapiens PE=2 SV=1           | 62079  | MAGPWIT  | 99    | 10.7 | 1        | 7        | 7      | 5    | 5       | 0.703  | 0.649 |          |          |
| 85   | tr B2R6W1 B2R6W1_HUMAN         | cDNA, FLJ93143, highly similar to Homo sapiens     | 111585 | MKVISLFI | 635   | 25.9 | -        | 91       | 4      | 19   | 2       | 1.218  | 1.098 |          |          |

|     |                                |                                                      |        |          |       |      |   |    |      |      |    |    |       |       |
|-----|--------------------------------|------------------------------------------------------|--------|----------|-------|------|---|----|------|------|----|----|-------|-------|
| 106 | spP02671 FIBA_HUMAN            | Fibrinogen alpha chain OS=Homo sapiens GN=FG         | 109041 | MFSMRIV  | 373   | 16.9 | - |    | 42   | 42   | 13 | 13 | 1.008 | 1.028 |
| 107 | tr B7Z565 B7Z565_HUMAN         | cDNA FLJ54739, highly similar to Alpha-actinin-1     | 111056 | MLLLEVIS | 38    | 2.4  |   | 2  | 4    | 4    | 2  | 2  | ---   | ---   |
| 108 | tr A0A024RDT5 A0A024RDT5_HUMAN | Periostin, osteoblast specific factor, isoform CRA_a | 106758 | MIPFLPMF | 55    | 2.1  |   | 3  | 1    | 1    | 1  | 1  | ---   | ---   |
| 109 | tr A0A024R755 A0A024R755_HUMAN | Calumenin, isoform CRA_a OS=Homo sapiens GN=         | 45743  | MDLRQFL  | 47    | 5.7  |   | 3  | 3    | 3    | 2  | 2  | ---   | ---   |
| 110 | sp P10909 CLUS_HUMAN           | Clusterin OS=Homo sapiens GN=CLU PE=1 SV=            | 62157  | MMKTLTL  | 3979  | 33.9 | - |    | 340  | 340  | 15 | 15 | 0.957 | 1     |
| 111 | tr A2J1N0 A2J1N0_HUMAN         | Rheumatoid factor RF-IP14 (Fragment) OS=Homo         | 11519  | QLVEFSGL | 99    | 30.2 | - |    | 15   | 4    | 3  | 1  | ---   | ---   |
| 112 | sp P10645 CMGA_HUMAN           | Chromogranin A OS=Homo sapiens GN=CHGA F             | 60563  | MRSAAVL  | 118   | 6.1  | - |    | 7    | 7    | 3  | 3  | 1.061 | 1.172 |
| 113 | tr Q9NPP6 Q9NPP6_HUMAN         | Immunoglobulin heavy chain variant (Fragment) O      | 50481  | PGKGLWE  | 578   | 22.1 | - |    | 72   | 2    | 8  | 1  | ---   | ---   |
| 114 | sp T22692 IBP4_HUMAN           | Insulin-like growth factor-binding protein 4 OS=H    | 33068  | MLPLCLV  | 34    | 5.4  | - |    | 3    | 3    | 1  | 1  | 1.051 | 0.927 |
| 115 | sp P16191 KV301_HUMAN          | Ig kappa chain V-III region B6 OS=Homo sapiens       | 12959  | ZVLZTSP  | 179   | 16.7 | - |    | 8    | 8    | 3  | 3  | 1.039 | 0.874 |
| 116 | sp P16610 ECM1_HUMAN           | Extracellular matrix protein 1 OS=Homo sapiens C     | 67099  | MGTTARA  | 464   | 27   | - |    | 54   | 54   | 13 | 13 | 0.93  | 0.848 |
| 117 | sp P06331 HV209_HUMAN          | Ig heavy chain V-II region ARH-77 OS=Homo sap        | 18519  | MKHLWFI  | 58    | 17.1 | - |    | 6    | 4    | 2  | 1  | 1.099 | 1.024 |
| 118 | sp P14543 NID1_HUMAN           | Nidogen-1 OS=Homo sapiens GN=NID1 PE=1 SV            | 148268 | MLASSSRI | 80    | 5.4  | - |    | 10   | 10   | 6  | 6  | 1.16  | 0.906 |
| 119 | sp Q96PD5 PGRP2_HUMAN          | N-acetyluramoyl-L-alanine amidase OS=Homo s          | 66703  | MAQQVFL  | 186   | 8.7  | - |    | 13   | 13   | 4  | 4  | 0.813 | 0.694 |
| 120 | tr Q6FGL0 Q6FGL0_HUMAN         | Galectin (Fragment) OS=Homo sapiens GN=LGA1          | 28940  | MADNFSL  | 38    | 4.4  |   | 3  | 1    | 1    | 1  | 1  | ---   | ---   |
| 121 | tr Q1HP67 Q1HP67_HUMAN         | Lipoprotein, Lp(A) OS=Homo sapiens GN=LPA P          | 240494 | MEHKEV   | 211   | 10.1 |   | 1  | 17   | 17   | 10 | 10 | 0.451 | 0.452 |
| 122 | tr B4D157 B4D157_HUMAN         | cDNA FLJ54111, highly similar to Serotransferrin     | 80545  | MNQLRG   | 134   | 6.2  |   | 4  | 11   | 11   | 6  | 6  | 1.114 | 0.93  |
| 123 | tr C9JCS4 C9JCS4_HUMAN         | Fibrinogen gamma chain OS=Homo sapiens GN=F          | 63883  | MSWSLFP  | 299   | 25.8 |   | 2  | 32   | 32   | 11 | 11 | 0.977 | 1.13  |
| 124 | sp P04197 GPV_HUMAN            | Platelet glycoprotein V OS=Homo sapiens GN=GF        | 65693  | MLRGTL   | 67    | 13.2 | - |    | 10   | 10   | 6  | 6  | 0.68  | 0.474 |
| 125 | tr B2R773 B2R773_HUMAN         | cDNA, FLJ93312, highly similar to Homo sapiens       | 30174  | MLLLGAV  | 151   | 16   |   | 1  | 12   | 12   | 3  | 3  | 1.067 | 1.1   |
| 126 | tr B4DUV1 B4DUV1_HUMAN         | Fibulin-1 OS=Homo sapiens PE=2 SV=1                  | 79879  | MATHQKI  | 284   | 25.9 | - |    | 42   | 15   | 13 | 4  | ---   | ---   |
| 127 | tr E7EV88 E7EV88_HUMAN         | A disintegrin and metalloproteinase with thrombos    | 52259  | MASDGA   | 75    | 8.8  |   | 1  | 6    | 6    | 4  | 4  | 1.187 | 0.911 |
| 128 | sp P08697 A2AP_HUMAN           | Alpha-2-antiplasmin OS=Homo sapiens GN=SER1          | 60957  | MALLWGL  | 421   | 17.7 | - |    | 62   | 62   | 8  | 8  | 0.94  | 0.815 |
| 129 | tr Q6MZM7 Q6MZM7_HUMAN         | Putative uncharacterized protein DKFZp686O121c       | 262413 | ARAGCAA  | 9056  | 32.7 | - |    | 750  | 1    | 54 | 1  | ---   | ---   |
| 130 | tr K7ER74 K7ER74_HUMAN         | Protein APOC4-APOC2 OS=Homo sapiens GN=A             | 23306  | MSLLRNR  | 455   | 28.1 |   | 1  | 66   | 66   | 4  | 4  | 0.977 | 0.997 |
| 131 | tr A2J1N5 A2J1N5_HUMAN         | Rheumatoid factor RF-ET6 (Fragment) OS=Homo          | 12382  | VESGGGV  | 49    | 23.4 | - |    | 6    | 1    | 2  | 1  | ---   | ---   |
| 132 | tr A0A0A0MT96 A0A0A0MT9_HUMAN  | Protein IGKJ3 (Fragment) OS=Homo sapiens GN=         | 2332   | XFTFGPG  | 28    | 69.2 | - |    | 1    | 1    | 1  | 1  | ---   | ---   |
| 133 | tr S6AWD3 S6AWD3_HUMAN         | IgG L chain OS=Homo sapiens PE=2 SV=1                | 22895  | MRLPAQL  | 907   | 23.5 | - |    | 130  | 1    | 4  | 1  | ---   | ---   |
| 134 | sp P07357 C08A_HUMAN           | Complement component C8 alpha chain OS=Homo          | 76870  | MFAVVVF  | 244   | 15.2 | - |    | 28   | 28   | 8  | 8  | 1.216 | 1.033 |
| 135 | tr D3DQX7 D3DQX7_HUMAN         | Serum amyloid A protein OS=Homo sapiens GN=          | 15436  | MKLLTGL  | 105   | 20.5 | - |    | 10   | 9    | 3  | 2  | 1.459 | 1.048 |
| 136 | tr B2R6M6 B2R6M6_HUMAN         | cDNA, FLJ93024, highly similar to Homo sapiens       | 60522  | MLKALFL  | 224   | 9.7  |   | 6  | 22   | 22   | 4  | 4  | 1.206 | 1.336 |
| 137 | tr Q96K68 Q96K68_HUMAN         | cDNA FLJ14473 fis, clone MAMMA1001080, hi            | 59670  | MELGLRW  | 1125  | 28.3 | - |    | 121  | 58   | 11 | 4  | 1.124 | 1.135 |
| 138 | tr Q6ZRG8 Q6ZRG8_HUMAN         | cDNA FLJ46365 fis, clone TEST14051054 OS=H           | 23673  | MGPGLV   | 30    | 3.2  |   | 1  | 5    | 1    | 1  | 1  | ---   | ---   |
| 139 | sp P67936 TPM4_HUMAN           | Tropomyosin alpha-4 chain OS=Homo sapiens GN         | 36528  | MAGLNSL  | 106   | 21.8 | - |    | 11   | 6    | 5  | 3  | 1.325 | 1.22  |
| 140 | tr A6YD2 A6YD2_HUMAN           | Fibronectin splice variant A (Fragment) OS=Homo      | 74428  | SQMQLP   | 2728  | 39.2 |   | 3  | 214  | 1    | 16 | 1  | ---   | ---   |
| 141 | sp P27169 PONI_HUMAN           | Serum paraoxonase/arylesterase 1 OS=Homo sapie       | 46266  | MAKLIA   | 613   | 23.1 | - |    | 81   | 81   | 8  | 8  | 1.039 | 0.917 |
| 142 | tr A0A024RCD0 A0A024RCD0_HUMAN | Protein convertase subtilisin/kexin type 6, isofo    | 109973 | MDPQVK   | 25    | 2.1  |   | 7  | 2    | 2    | 2  | 2  | ---   | ---   |
| 143 | tr B4DN21 B4DN21_HUMAN         | cDNA FLJ53365, highly similar to Homo sapiens        | 38489  | MIFEEHGI | 2830  | 43.1 |   | 1  | 173  | 4    | 11 | 1  | 0.911 | 0.845 |
| 144 | sp P02763 A1AG1_HUMAN          | Alpha-1-acid glycoprotein 1 OS=Homo sapiens GP       | 28288  | MALSWV   | 54    | 7.5  | - |    | 5    | 5    | 1  | 1  | 0.797 | 0.895 |
| 145 | tr E1U340 E1U340_HUMAN         | ZNF511/PRAP1 fusion protein OS=Homo sapiens          | 41096  | MQVADV   | 30    | 5.5  |   | 2  | 4    | 4    | 2  | 2  | ---   | ---   |
| 146 | tr D6RAR4 D6RAR4_HUMAN         | Hepatocyte growth factor activator OS=Homo sapi      | 78528  | MGRWAW   | 45    | 1.7  |   | 1  | 4    | 4    | 1  | 1  | ---   | ---   |
| 147 | tr A0A087WYJ9 A0A087WYJ9_HUMAN | Ig mu chain C region OS=Homo sapiens GN=IGHI         | 74671  | MSVSFLF  | 7728  | 35.4 | - |    | 611  | 4    | 21 | 2  | ---   | ---   |
| 148 | tr B2RBZ5 B2RBZ5_HUMAN         | cDNA, FLJ95778, highly similar to Homo sapiens       | 60491  | MKVVPVL  | 328   | 16.4 | - |    | 31   | 1    | 8  | 1  | ---   | ---   |
| 149 | tr D3DQHS D3DQHS_HUMAN         | Coiled-coil domain containing 69, isoform CRA_a      | 41482  | MGCRHSR  | 29    | 4.7  | - |    | 2    | 2    | 2  | 2  | ---   | ---   |
| 150 | tr B7Z549 B7Z549_HUMAN         | cDNA FLJ56821, highly similar to Inter-alpha-tryp    | 87971  | MDMGAM   | 1649  | 28.1 |   | 1  | 119  | 119  | 15 | 15 | 1.098 | 1.03  |
| 151 | tr F5H0G0 F5H0G0_HUMAN         | ATP-binding cassette sub-family B member 9 OS=       | 33165  | MRLWAK   | 33    | 2.6  |   | 3  | 5    | 5    | 1  | 1  | ---   | ---   |
| 152 | tr A2IP14 A2IP14_HUMAN         | HRV Fab 025-VL (Fragment) OS=Homo sapiens            | 14086  | MAELQM   | 67    | 8.8  | - |    | 2    | 2    | 1  | 1  | ---   | ---   |
| 153 | sp P00734 THR8_HUMAN           | Prothrombin OS=Homo sapiens GN=F2 PE=1 SV=           | 80601  | MAHVRI   | 5988  | 58.5 | - |    | 555  | 555  | 31 | 31 | 1.043 | 1.089 |
| 154 | sp Q92954 PRG4_HUMAN           | Proteoglycan 4 OS=Homo sapiens GN=PRG4 PE=1          | 202736 | MAWKTLI  | 94    | 4.5  | - |    | 12   | 12   | 7  | 7  | 0.695 | 0.696 |
| 155 | sp P01861 IGHG4_HUMAN          | Ig gamma-4 chain C region OS=Homo sapiens GN         | 44036  | ASTKGPS  | 603   | 25.1 | - |    | 38   | 3    | 6  | 2  | ---   | ---   |
| 156 | tr Q8TCZ8 Q8TCZ8_HUMAN         | Apolipoprotein E (Fragment) OS=Homo sapiens G        | 7933   | RLGADME  | 953   | 54.4 | - |    | 49   | 1    | 3  | 1  | ---   | ---   |
| 157 | sp P01708 V205_HUMAN           | Ig lambda chain V-II region BUR OS=Homo sapie        | 13495  | QSALTOP  | 36    | 10.1 | - |    | 1    | 1    | 1  | 1  | ---   | ---   |
| 158 | sp P07996 TSP1_HUMAN           | Thrombospondin-1 OS=Homo sapiens GN=THBS             | 150327 | MGLAWPI  | 1599  | 25.5 | - |    | 210  | 4    | 27 | 1  | 1.534 | 0.833 |
| 159 | sp Q4G0X9 CCD40_HUMAN          | Coiled-coil domain-containing protein 40 OS=Hom      | 155929 | MAEPGGA  | 21    | 0.7  | - |    | 4    | 4    | 1  | 1  | ---   | ---   |
| 160 | sp O00187 MASP2_HUMAN          | Mannan-binding lectin serine protease 2 OS=Homo      | 86928  | MRLTLTL  | 241   | 12.5 | - |    | 30   | 30   | 9  | 9  | 1.078 | 1.235 |
| 161 | tr B1AH77 B1AH77_HUMAN         | Ras-related C3 botulinum toxin substrate 2 OS=Hc     | 21005  | MVDSKPV  | 35    | 9.5  |   | 3  | 1    | 1    | 1  | 1  | ---   | ---   |
| 162 | tr B4E1D8 B4E1D8_HUMAN         | cDNA FLJ51597, highly similar to C4b-binding pr      | 71792  | MDITLTI  | 1578  | 33.4 | - |    | 226  | 226  | 16 | 16 | 1.059 | 1.036 |
| 163 | tr Q4LE64 Q4LE64_HUMAN         | NUMA1 variant protein (Fragment) OS=Homo sap         | 286341 | LSGTMFL  | 24    | 0.3  |   | 1  | 1    | 1    | 1  | 1  | ---   | ---   |
| 164 | sp Q8617 SPA11_HUMAN           | Serpin A11 OS=Homo sapiens GN=SERPINA11 I            | 53519  | MGPAPWL  | 42    | 3.3  | - |    | 1    | 1    | 1  | 1  | ---   | ---   |
| 165 | tr B7ZLY3 B7ZLY3_HUMAN         | LTBP1 protein OS=Homo sapiens GN=LTBP1 PE            | 175722 | MDTKLM   | 66    | 3    |   | 3  | 6    | 6    | 3  | 3  | 0.923 | 0.852 |
| 166 | tr B4DDF8 B4DDF8_HUMAN         | cDNA FLJ51786, highly similar to Retinal dehydr      | 56272  | MDASERG  | 24    | 2.1  |   | 3  | 1    | 1    | 1  | 1  | ---   | ---   |
| 167 | tr G3XAM2 G3XAM2_HUMAN         | Complement factor 1 light chain OS=Homo sapiens      | 80796  | MKLLHVF  | 64    | 5.7  |   | 4  | 5    | 5    | 3  | 3  | 1.123 | 1.084 |
| 168 | sp P01024 C03_HUMAN            | Complement C3 OS=Homo sapiens GN=C3 PE=1             | 223249 | MGPTSGP  | 14077 | 52.2 | - |    | 1426 | 1426 | 79 | 79 | 0.879 | 0.874 |
| 169 | tr B0Y1W2 B0Y1W2_HUMAN         | Apolipoprotein C-III OS=Homo sapiens GN=APO          | 14994  | MGTWGA   | 1654  | 29.1 |   | 1  | 130  | 130  | 3  | 3  | 0.871 | 0.87  |
| 170 | tr A0A075B6J9 A0A075B6J9_HUMAN | HCG1782423 (Fragment) OS=Homo sapiens GN=            | 13724  | MAWALLI  | 43    | 10.8 |   | 1  | 1    | 1    | 1  | 1  | ---   | ---   |
| 171 | sp P0DJJ9 SAA2_HUMAN           | Serum amyloid A-2 protein OS=Homo sapiens GN         | 15401  | MKLLTGL  | 29    | 20.5 | - |    | 2    | 1    | 2  | 1  | ---   | ---   |
| 172 | sp P01031 C05_HUMAN            | Complement C5 OS=Homo sapiens GN=C5 PE=1             | 226401 | MGLGLGL  | 1032  | 21.8 | - |    | 167  | 167  | 36 | 36 | 1.115 | 1.104 |
| 173 | tr C1K3N3 C1K3N3_HUMAN         | Insulin-like growth factor binding protein 1 (Fragm  | 31823  | SEVPVAR  | 94    | 11.2 |   | 3  | 9    | 9    | 3  | 3  | 0.994 | 0.859 |
| 174 | tr A0A068LRW6 A0A068LRW6_HUMAN | Ig heavy chain variable region (Fragment) OS=H       | 16657  | QVTLRES  | 25    | 5.5  | - |    | 2    | 1    | 1  | 1  | ---   | ---   |
| 175 | tr A0A024R035 A0A024R035_HUMAN | Phospholipase A2, group VII (Platelet-activating f   | 59600  | MVPPKHL  | 38    | 1.8  | - |    | 2    | 2    | 1  | 1  | ---   | ---   |
| 176 | tr A0A087X1J7 A0A087X1J7_HUMAN | Glutathione peroxidase OS=Homo sapiens GN=GP         | 30481  | MARLLQA  | 713   | 34.7 |   | 1  | 101  | 101  | 7  | 7  | 1.097 | 1.038 |
| 177 | sp P48740 MASP1_HUMAN          | Mannan-binding lectin serine protease 1 OS=Homo      | 92409  | MRWLLA   | 566   | 26   | - |    | 59   | 15   | 14 | 6  | 1.306 | 1.34  |
| 178 | sp P04220 MUCB_HUMAN           | Ig mu heavy chain disease protein OS=Homo sapie      | 49019  | DSPLEQSC | 2388  | 33.8 | - |    | 286  | 3    | 12 | 1  | ---   | ---   |
| 179 | tr J3KPY9 J3KPY9_HUMAN         | Anthrax toxin receptor 2 OS=Homo sapiens GN=A        | 54148  | MRLSFVF  | 65    | 16.8 |   | 1  | 8    | 7    | 6  | 5  | 0.535 | 0.454 |
| 180 | sp P02760 AMBP_HUMAN           | Protein AMBP OS=Homo sapiens GN=AMBP PE=             | 45666  | MRLSLGA  | 138   | 16.5 | - |    | 11   | 11   | 4  | 4  | 1.126 | 1.171 |
| 181 | sp P58166 INHB_HUMAN           | Inhibin beta E chain OS=Homo sapiens GN=INHE         | 41712  | MRLPDVQ  | 64    | 2.3  | - |    | 5    | 5    | 1  | 1  | 0.859 | 0.921 |
| 182 | sp Q07960 RHG01_HUMAN          | Rho GTPase-activating protein 1 OS=Homo sapier       | 59892  | MDPLSEL  | 31    | 2.3  | - |    | 1    | 1    | 1  | 1  | ---   | ---   |
| 183 | tr H0YJ31 H0YJ31_HUMAN         | Fibulin-5 (Fragment) OS=Homo sapiens GN=FB           | 19441  | XFTGSCS  | 44    | 10.2 |   | 4  | 1    | 1    | 1  | 1  | ---   | ---   |
| 184 | tr B4E0A4 B4E0A4_HUMAN         | cDNA FLJ57023, highly similar to Homo sapiens        | 149266 | MKRKHRI  | 124   | 4.3  |   | 4  | 12   | 12   | 5  | 5  | 0.562 | 0.549 |
| 185 | sp P06312 KV401_HUMAN          | Ig kappa chain V-IV region (Fragment) OS=Homo        | 15007  | MVLQTVQ  | 177   | 17.4 |   | 1  | 19   | 2    | 2  | 1  | ---   | ---   |
| 186 | sp P01591 IGJ_HUMAN            | Immunoglobulin J chain OS=Homo sapiens GN=IC         | 21585  | MKNHLLF  | 69    | 35.2 | - |    | 23   | 23   | 5  | 5  | 1.166 | 1.094 |
| 187 | tr A0A087WZ88 A0A087WZ88_HUMAN | Protein IGKV3-11 OS=Homo sapiens GN=IGKV3            | 29520  | MEAPAPL  | 1412  | 49.8 | - |    | 164  | 2    | 8  | 1  | ---   | ---   |
| 188 | tr A0A0A0MRJ7 A0A0A0MRJ7_HUMAN | Coagulation factor V OS=Homo sapiens GN=F5 P         | 292156 | MFPGCPRL | 1409  | 16.3 |   | 1  | 166  | 164  | 33 | 32 | 0.961 | 0.975 |
| 189 | tr B4DPQ0 B4DPQ0_HUMAN         | Complement C1r subcomponent OS=Homo sapiens          | 94632  | MSVRFVR  | 429   | 26.6 |   | 4  | 48   | 48   | 16 | 16 | 1.163 | 1.031 |
| 190 | sp P0C0S8 H2A1_HUMAN           | Histone H2A type 1 OS=Homo sapiens GN=HIST           | 18646  | MSGRGKC  | 46    | 14.6 |   | 12 | 2    | 2    | 1  | 1  | 1.529 | 1.57  |
| 191 | sp P05164 PERM_HUMAN           | Myeloperoxidase OS=Homo sapiens GN=MPO PE=           | 91781  | MGPVPFFS | 129   | 8.5  | - |    | 15   | 8    | 6  | 4  | 1.748 | 1.988 |
| 192 | tr L8E853 L8E853_HUMAN         | von Willebrand factor OS=Homo sapiens GN=VW          | 341812 | MIPARFAC | 627   | 7.5  | - |    | 65   | 65   | 19 | 19 | 0.813 | 0.665 |
| 193 | tr A0A024R035 A0A024R035_HUMAN | Complement component 9, isoform CRA_a OS=Hc          | 76205  | MSACWQS  | 1009  | 28.3 |   | 1  | 111  | 111  | 18 | 18 | 1.023 | 1.05  |
| 194 |                                |                                                      |        |          |       |      |   |    |      |      |    |    |       |       |

|     |                          |                                                      |        |          |       |      |   |    |      |     |    |       |       |
|-----|--------------------------|------------------------------------------------------|--------|----------|-------|------|---|----|------|-----|----|-------|-------|
| 215 | trQ96JD0 Q96JD0_HUMAN    | Amyloid lambda 6 light chain variable region SAR     | 13922  | NFMLTQP  | 149   | 20.7 | - | 39 | 1    | 2   | 1  | ---   | ---   |
| 216 | trG3XAK1 G3XAK1_HUMAN    | Hepatocyte growth factor-like protein alpha chain (  | 91508  | MGLWVV   | 56    | 4.1  |   | 2  | 3    | 3   | 2  | ---   | ---   |
| 217 | trE7EUT5 E7EUT5_HUMAN    | Glyceraldehyde-1-phosphate dehydrogenase OS=H        | 34412  | MEEMRDI  | 175   | 18.5 |   | 1  | 11   | 11  | 3  | 1.515 | 1.089 |
| 218 | tr A0A087X079 A0A087X079 | Ig gamma-1 chain C region OS=Homo sapiens GN         | 62850  | MEFGLSW  | 3604  | 35.1 | - |    | 315  | 1   | 13 | 1     | ---   |
| 219 | tr A0A087WW89 A0A087WW   | Protein IGHV3-72 OS=Homo sapiens GN=IGHV3            | 13100  | EVQLVLSW | 387   | 49.5 | - |    | 12   | 1   | 4  | 1     | ---   |
| 220 | tr Q6NUL6 Q6NUL6_HUMAN   | PITPNA protein (Fragment) OS=Homo sapiens GN         | 44984  | PQRRPAP  | 25    | 5.1  | - |    | 1    | 1   | 1  | 1     | ---   |
| 221 | spP01008 ANT3_HUMAN      | Antithrombin-III OS=Homo sapiens GN=SERPIN           | 64585  | MYSNVIG  | 7673  | 52.8 | - |    | 676  | 676 | 25 | 25    | 0.925 |
| 222 | tr A0A024R9Q1 A0A024R9Q1 | Thrombospondin 1, isoform CRA_a OS=Homo sap          | 150297 | MGLAWG   | 1658  | 25.0 | - |    | 214  | 8   | 27 | 1     | 1.307 |
| 223 | tr Q6PIQ7 Q6PIQ7_HUMAN   | IGL@ protein OS=Homo sapiens GN=IGL@ PE=1 S          | 29910  | MAWALLI  | 1404  | 38.1 | - |    | 186  | 8   | 8  | 1     | ---   |
| 224 | tr A0A087WU43 A0A087WU4  | Cadherin-1 OS=Homo sapiens GN=CDH1 PE=1 S            | 79244  | MGVPVSR  | 34    | 2.9  |   | 10 | 2    | 2   | 2  | ---   | ---   |
| 225 | tr A0A075B6H6 A0A075B6H6 | Ig kappa chain C region (Fragment) OS=Homo sap       | 14622  | XTVAAPS  | 1005  | 80.4 | - |    | 74   | 45  | 6  | 2     | 0.791 |
| 226 | tr A0A024R972 A0A024R972 | Laminin, gamma 1 (Formerly LAMB2), isoform C1        | 204490 | MDECTDE  | 53    | 1    |   | 1  | 1    | 1   | 1  | ---   | ---   |
| 227 | tr S6BGE0 S6BGE0_HUMAN   | IgG H chain OS=Homo sapiens PE=2 SV=1                | 37846  | MEFGLSW  | 1429  | 22.7 | - |    | 130  | 2   | 5  | 1     | ---   |
| 228 | spP35527 K1C9_HUMAN      | Keratin, type I cytoskeletal 9 OS=Homo sapiens G     | 70468  | MSCRQFS  | 62    | 10.4 | - |    | 7    | 7   | 5  | 0.63  | 0.618 |
| 229 | tr B3KQ18 B3KQ18_HUMAN   | cDNA FLJ32632 fis, clone SYN0V1000190, high          | 56595  | MLKKQSA  | 53    | 2    |   | 4  | 2    | 2   | 1  | 1     | ---   |
| 230 | spP02747 C1QC_HUMAN      | Complement C1q subcomponent subunit C OS=Ho          | 29940  | MDVGPSS  | 716   | 21.2 | - |    | 50   | 50  | 4  | 4     | 1.129 |
| 231 | spP15169 CBPN_HUMAN      | Carboxypeptidase N catalytic chain OS=Homo sap       | 58014  | MSDLLSV  | 37    | 2    | - |    | 4    | 4   | 1  | 1     | ---   |
| 232 | tr A0A068LKQ0 A0A068LKQ  | Ig heavy chain variable region (Fragment) OS=Hoi     | 15284  | EVQLVQS  | 181   | 10   | - |    | 8    | 8   | 1  | 1     | 0.98  |
| 233 | spP23560 BDNF_HUMAN      | Brain-derived neurotrophic factor OS=Homo sapie      | 33675  | MTILFTLV | 48    | 6.1  | - |    | 1    | 1   | 1  | 1     | ---   |
| 234 | tr B2R7N9 B2R7N9_HUMAN   | cDNA, FLJ93532, highly similar to Homo sapiens       | 57509  | MGLSPY   | 41    | 2.4  |   | 1  | 1    | 1   | 1  | 1     | ---   |
| 235 | spP13645 K1C10_HUMAN     | Keratin, type I cytoskeletal 10 OS=Homo sapiens C    | 66321  | MSVRYSS  | 504   | 13.5 | - |    | 23   | 22  | 7  | 6     | 0.468 |
| 236 | tr B2RDL6 B2RDL6_HUMAN   | cDNA, FLJ96669, highly similar to Homo sapiens       | 41811  | MRAWIFF  | 160   | 7.9  | - |    | 4    | 15  | 3  | 3     | 1.205 |
| 237 | sp PCOL4 C04A_HUMAN      | Complement C4-A OS=Homo sapiens GN=C4A PI            | 217989 | MRLLWGI  | 18599 | 42   | - |    | 1660 | 16  | 65 | 2     | 0.79  |
| 238 | tr E7EQB2 E7EQB2_HUMAN   | Lactotransferrin (Fragment) OS=Homo sapiens GN       | 92148  | MGLCLAG  | 602   | 30.2 |   | 2  | 52   | 52  | 18 | 2.479 | 2.434 |
| 239 | sp P07360 C08G_HUMAN     | Complement component C8 gamma chain OS=Hon           | 24260  | MLPPTGA  | 327   | 55   | - |    | 28   | 28  | 9  | 9     | 1.086 |
| 240 | tr S6BAR0 S6BAR0_HUMAN   | IgG L chain OS=Homo sapiens PE=2 SV=1                | 27347  | MAWTPFL  | 1409  | 34.7 | - |    | 168  | 29  | 7  | 2     | 0.988 |
| 241 | tr V9GYE7 V9GYE7_HUMAN   | Complement factor H-related protein 2 OS=Homo        | 34920  | MWLLVGS  | 444   | 24.8 |   | 1  | 37   | 7   | 6  | 2     | 1.319 |
| 242 | tr B2R7D2 B2R7D2_HUMAN   | cDNA, FLJ93389, highly similar to Homo sapiens       | 64534  | MLRAPGC  | 36    | 2.1  |   | 2  | 2    | 2   | 1  | 1     | ---   |
| 243 | tr C9I8S2 C9I8S2_HUMAN   | Retinoic acid receptor responder protein 2 (Fragme   | 21794  | MRLLLIPI | 118   | 14.5 |   | 1  | 7    | 7   | 2  | 2     | 1.025 |
| 244 | tr B4E1Z4 B4E1Z4_HUMAN   | Uncharacterized protein OS=Homo sapiens PE=2 S       | 168440 | MGLPMLV  | 349   | 10.3 |   | 1  | 40   | 40  | 13 | 13    | 0.965 |
| 245 | sp PDJ18 SAA1_HUMAN      | Serum amyloid A-1 protein OS=Homo sapiens GN         | 15406  | MKLLTGL  | 125   | 20.5 | - |    | 8    | 7   | 2  | 1     | 1.061 |
| 246 | tr Q5J875 Q5J875_HUMAN   | GUGU gamma form OS=Homo sapiens GN=GUG               | 41888  | MGLFLPL  | 47    | 8.5  |   | 3  | 7    | 7   | 3  | 0.264 |       |
| 247 | sp PCOL5 C04B_HUMAN      | Complement C4-B OS=Homo sapiens GN=C4B PI            | 217898 | MRLLWGI  | 19149 | 42   | - |    | 1692 | 38  | 65 | 2     | 0.844 |
| 248 | tr A0A087X232 A0A087X232 | Complement C1s subcomponent OS=Homo sapiens          | 89564  | MYGELIS  | 364   | 16.1 |   | 3  | 53   | 53  | 11 | 11    | 1.125 |
| 249 | sp P02743 SAMP_HUMAN     | Serum amyloid P-component OS=Homo sapiens G1         | 29440  | MNKLPLW  | 926   | 34.1 | - |    | 102  | 102 | 9  | 9     | 1.086 |
| 250 | tr C8C504 C8C504_HUMAN   | Beta-globin OS=Homo sapiens GN=HBB PE=3 S'           | 20056  | MVHLTPE  | 157   | 35.4 |   | 1  | 14   | 14  | 5  | 5     | 1.11  |
| 251 | sp O00391 QSOK1_HUMAN    | Sulphydryl oxidase 1 OS=Homo sapiens GN=QSO          | 93667  | MRRNCNG  | 373   | 21.3 | - |    | 61   | 61  | 16 | 16    | 0.816 |
| 252 | sp P22792 CPN2_HUMAN     | Carboxypeptidase N subunit 2 OS=Homo sapiens C       | 65328  | MLPGAWI  | 167   | 15.2 | - |    | 26   | 26  | 8  | 8     | 1.162 |
| 253 | tr B3BN62 B3BN62_HUMAN   | Breast cancer anti-estrogen resistance protein 1 (Fr | 28074  | XPQFQSP  | 30    | 7.1  | - |    | 1    | 1   | 1  | 1     | ---   |
| 254 | tr Q5NV90 Q5NV90_HUMAN   | V2-17 protein (Fragment) OS=Homo sapiens GN=         | 11730  | SYELTOPF | 145   | 41.2 | - |    | 16   | 2   | 3  | 1     | ---   |
| 255 | sp P02790 HEMO_HUMAN     | Hemopexin OS=Homo sapiens GN=HPX PE=1 SV             | 59077  | MARVLG   | 33    | 6.5  | - |    | 3    | 3   | 3  | 3     | ---   |
| 256 | sp P01768 HV307_HUMAN    | Ig heavy chain V-III region CAM OS=Homo sapie        | 15294  | QVELVES  | 87    | 21.3 | - |    | 12   | 12  | 3  | 3     | 1.168 |
| 257 | sp Q5SNT2 TM201_HUMAN    | Transmembrane protein 201 OS=Homo sapiens G2         | 79528  | MEGVSAI  | 29    | 1.5  | - |    | 2    | 2   | 1  | 1     | ---   |
| 258 | sp P68366 TBA4A_HUMAN    | Tubulin alpha-4A chain OS=Homo sapiens GN=TI         | 56718  | MRECSIVS | 81    | 9.8  | - |    | 5    | 1   | 3  | 1     | ---   |
| 259 | tr A2NYU7 A2NYU7_HUMAN   | Heavy chain Fab (Fragment) OS=Homo sapiens PI        | 16036  | QVKLLSES | 26    | 7.1  | - |    | 1    | 1   | 1  | 1     | ---   |
| 260 | sp P43251 BTD_HUMAN      | Biotinidase OS=Homo sapiens GN=BTD PE=1 SV           | 68090  | MAHAHIQ  | 145   | 5.7  | - |    | 12   | 12  | 3  | 3     | 0.999 |
| 261 | tr A0A096LPE2 A0A096LPE2 | Protein SAA2-SAA4 OS=Homo sapiens GN=SAA             | 26856  | MKLLTGL  | 304   | 21.2 | - |    | 60   | 59  | 4  | 3     | 0.759 |
| 262 | tr A0A024R498 A0A024R498 | Serpin peptidase inhibitor, clade E (Nexin, plasmin  | 53326  | MNWHPLI  | 36    | 9.1  |   | 2  | 3    | 3   | 3  | 3     | 1.064 |
| 263 | tr B7Z8Q2 B7Z8Q2_HUMAN   | cDNA FLJ55606, highly similar to Alpha-2-HS-gl       | 53042  | MFAGCFF  | 264   | 13.4 |   | 2  | 24   | 24  | 5  | 5     | 0.99  |
| 264 | tr B2R815 B2R815_HUMAN   | cDNA, FLJ93695, highly similar to Homo sapiens       | 57184  | MHLIDYL  | 167   | 17.1 |   | 1  | 25   | 25  | 7  | 7     | 0.774 |
| 265 | sp P13671 C06_HUMAN      | Complement component C6 OS=Homo sapiens GN           | 128749 | MARRSRV  | 809   | 19.5 | - |    | 77   | 77  | 18 | 18    | 1.06  |
| 266 | sp Q4L235 ACSF4_HUMAN    | Acyl-CoA synthetase family member 4 OS=Homo          | 147330 | MTLQELV  | 32    | 0.7  |   | 4  | 6    | 6   | 1  | 1     | ---   |
| 267 | tr B3KP53 B3KP53_HUMAN   | cDNA FLJ32131 fis, clone PEBLM2000267, high          | 52809  | MPSDKTK  | 100   | 15.4 |   | 8  | 7    | 3   | 4  | 2     | 1.209 |
| 268 | tr Q4ZFWS Q4ZFWS_HUMAN   | Putative uncharacterized protein IHH OS=Homo si      | 34275  | MNQWPHG  | 29    | 4.1  |   | 1  | 1    | 1   | 1  | 1     | ---   |
| 269 | sp P00742 FA10_HUMAN     | Coagulation factor X OS=Homo sapiens GN=F10          | 66408  | MGRPLHL  | 37    | 11.7 | - |    | 6    | 5   | 6  | 5     | ---   |
| 270 | sp P01023 A2MG_HUMAN     | Alpha-2-macroglobulin OS=Homo sapiens GN=A2          | 191992 | MGKNKLI  | 479   | 10.3 | - |    | 41   | 31  | 14 | 11    | 1.113 |
| 271 | tr A8K7Q1 A8K7Q1_HUMAN   | cDNA FLJ77770, highly similar to Homo sapiens i      | 62976  | MPPSGPR  | 55    | 10.2 |   | 2  | 5    | 5   | 4  | 4     | 1.074 |
| 272 | tr Q53GU8 Q53GU8_HUMAN   | Transforming growth factor, beta-induced, 68kDa      | 85574  | MALFVPL  | 69    | 9.2  |   | 1  | 6    | 6   | 6  | 6     | 1.021 |
| 273 | sp Q03591 FHR1_HUMAN     | Complement factor H-related protein 1 OS=Homo        | 43938  | MWLLVSF  | 957   | 33   | - |    | 97   | 20  | 10 | 2     | 1.343 |
| 274 | tr A2RTY6 A2RTY6_HUMAN   | Inter-alpha (Globulin) inhibitor H2 OS=Homo sapi     | 126903 | MKRLTCF  | 1439  | 27.7 |   | 3  | 145  | 145 | 24 | 24    | 1.103 |
| 275 | sp P00451 FA8_HUMAN      | Coagulation factor VIII OS=Homo sapiens GN=F8        | 316692 | QMIJELST | 129   | 3.1  | - |    | 10   | 10  | 7  | 7     | 1.019 |
| 276 | tr Q6U2L6 Q6U2L6_HUMAN   | C4B (Fragment) OS=Homo sapiens GN=C4B PE=            | 11768  | RSMQGGC  | 306   | 15   | - |    | 53   | 52  | 4  | 3     | 0.744 |
| 277 | tr B7Z3Y2 B7Z3Y2_HUMAN   | cDNA FLJ51879, highly similar to Prenylcysteine      | 56786  | MVQGOE   | 40    | 5.2  |   | 5  | 2    | 2   | 2  | 2     | ---   |
| 278 | tr A0A024R1G8 A0A024R1G8 | Apolipoprotein L, 1, isoform CRA_b OS=Homo sa        | 54476  | MRFKSHT  | 561   | 20   |   | 11 | 63   | 63  | 9  | 9     | 0.359 |
| 279 | tr A0A024RDB8 A0A024RDB8 | Heparanase, isoform CRA_a OS=Homo sapiens G          | 73287  | MLLRSKT  | 105   | 6.6  |   | 2  | 14   | 14  | 4  | 4     | 1.427 |
| 280 | tr A0A087WSY6 A0A087WSY  | Protein IGKV3-15 (Fragment) OS=Homo sapien           | 13346  | MEAPAPL  | 49    | 25.9 | - |    | 3    | 1   | 2  | 1     | ---   |
| 281 | tr A0A024R3W6 A0A024R3W  | Neurophilin 2, isoform CRA_h OS=Homo sapiens C       | 115991 | MDMFPLT  | 59    | 1.1  |   | 7  | 2    | 2   | 1  | 1     | 0.88  |
| 282 | sp Q07954 LRP1_HUMAN     | Protein tyrosine phosphatase-related protein         | 576082 | MLTPPLLI | 243   | 3.5  | - |    | 29   | 29  | 14 | 14    | 1.193 |
| 283 | tr A0A024R592 A0A024R592 | Glucosidase, alpha neutral AB, isoform CRA_b O       | 104019 | MTTRFRDI | 52    | 3.1  |   | 7  | 6    | 6   | 3  | 3     | ---   |
| 284 | tr A2J1N7 A2J1N7_HUMAN   | Rheumatoid factor RF-ET10 (Fragment) OS=Homo         | 13037  | VESGGGL  | 24    | 7.3  | - |    | 4    | 4   | 1  | 1     | ---   |
| 285 | tr A0A024R462 A0A024R462 | Fibronectin 1, isoform CRA_n OS=Homo sapiens         | 286673 | MLRGPGP  | 10599 | 36.3 | - |    | 863  | 66  | 64 | 9     | 1.11  |
| 286 | tr A0A075B6I1 A0A075B6I1 | Protein IGLV4-60 (Fragment) OS=Homo sapiens C        | 14671  | MAWTPLL  | 19    | 7.5  |   | 1  | 1    | 1   | 1  | 1     | ---   |
| 287 | tr Q5T9B7 Q5T9B7_HUMAN   | Adenylate kinase isoenzyme 1 OS=Homo sapiens C       | 29708  | MGCCSSS  | 40    | 5.7  |   | 2  | 1    | 1   | 1  | 1     | ---   |
| 288 | tr Q53FV4 Q53FV4_HUMAN   | Lumican variant (Fragment) OS=Homo sapiens PE        | 46640  | MSLSAFTI | 253   | 17.1 | - |    | 35   | 35  | 7  | 7     | 1.047 |
| 289 | tr B2R892 B2R892_HUMAN   | cDNA, FLJ93793, highly similar to Homo sapiens       | 54181  | MPFGNTH  | 256   | 8.1  |   | 2  | 12   | 12  | 2  | 2     | 0.976 |
| 290 | tr Q6N093 Q6N093_HUMAN   | Putative uncharacterized protein DKFZp686I0419       | 55234  | FFNYAMH  | 1173  | 28.1 | - |    | 132  | 1   | 9  | 1     | ---   |
| 291 | tr Q86T71 Q86T71_HUMAN   | Full-length cDNA clone CS0DD006YL02 of Neur          | 47597  | MQGTDEF  | 6862  | 43.7 | - |    | 516  | 8   | 15 | 1     | 1.026 |
| 292 | tr A8K5T0 A8K5T0_HUMAN   | cDNA FLJ75416, highly similar to Homo sapiens        | 168175 | MRLLAKII | 2190  | 29.7 | - |    | 270  | 5   | 32 | 1     | 1.214 |
| 293 | tr H0Y485 H0Y485_HUMAN   | Insulin-like growth factor-binding protein 3 (Fragr  | 22968  | XESPSVSS | 48    | 20.3 |   | 14 | 6    | 6   | 3  | 3     | 1.494 |
| 294 | sp P05546 HEP2_HUMAN     | Heparin cofactor 2 OS=Homo sapiens GN=SERPI          | 67548  | MKHSLSA  | 699   | 28.1 | - |    | 115  | 16  | 16 | 16    | 0.473 |
| 295 | sp Q8NBP7 PCSK9_HUMAN    | Proprotein convertase subtilisin/kexin type 9 OS=F   | 80589  | MGTVSSR  | 198   | 7.1  | - |    | 14   | 14  | 4  | 4     | 1.034 |
| 296 | sp P05154 IPSP_HUMAN     | Plasma serine protease inhibitor OS=Homo sapiens     | 53365  | MQLLQLL  | 1239  | 31.3 | - |    | 88   | 88  | 13 | 13    | 0.9   |
| 297 | sp Q6P988 NOTUM_HUMAN    | Protein notum homolog OS=Homo sapiens GN=N           | 61196  | MGRGVRY  | 60    | 2.4  |   | 2  | 2    | 2   | 1  | 1     | ---   |
| 298 | tr B2R8A1 B2R8A1_HUMAN   | cDNA, FLJ93802, highly similar to Homo sapiens       | 42151  | MVSGSSG  | 91    | 3    |   | 4  | 17   | 17  | 1  | 1     | 0.938 |
| 299 | tr A0A024R0A9 A0A024R0A9 | Stromal cell derived factor 4, isoform CRA_b OS=     | 46142  | MVWPVVV  | 59    | 8.6  |   | 3  | 5    | 5   | 3  | 3     | 0.988 |
| 300 | tr F2RM37 F2RM37_HUMAN   | Coagulation factor IX OS=Homo sapiens GN=F9 I        | 61901  | MQVRMNV  | 56    | 10   |   | 1  | 4    | 1   | 4  | 1     | ---   |
| 301 | tr B0AZL7 B0AZL7_HUMAN   | cDNA, FLJ79457, highly similar to Insulin-like gr    | 70047  | MALRKGC  | 48    | 5.3  |   | 2  | 4    | 4   | 3  | 3     | ---   |
| 302 | tr B2R8I2 B2R8I2_HUMAN   | cDNA, FLJ93914, highly similar to Homo sapiens       | 67498  | MKALLAA  | 211   | 22.1 |   | 1  | 29   | 29  | 11 | 11    | 1.28  |
| 303 | tr Q5CAQ5 Q5CAQ5_HUMAN   | Tumor rejection antigen (Gp96) 1 OS=Homo sapie       | 116600 | MRALWVI  | 294   | 17.2 |   | 1  | 33   | 30  | 14 | 13    | 1.054 |
| 304 | tr A0A024RDF8 A0A024RDF8 | Alcohol dehydrogenase 4 (Class II), pi polypeptide   | 51465  | MGTKGK   | 41    | 6.8  |   | 2  | 3    | 3   | 3  | 3     | ---   |
| 305 | tr A0A087X0N5 A0A087X0N5 | Protein IGKV1-17 OS=Homo sapiens GN=IGKV1            | 11818  | DIQMTQSI | 161   | 35.1 |   | 2  | 9    | 4   | 2  | 1     | 0.876 |
| 306 | tr Q6N030 Q6N030_HUMAN   | Putative uncharacterized protein DKFZp686I1521       | 68162  | MDWTSWR  | 1925  | 18.1 |   | 6  | 173  | 49  | 9  | 3     | 1.197 |
| 307 | tr F5GY80 F5GY80_HUMAN   | Complement component C8 beta chain OS=Homo           | 70611  | MDTCMTI  | 214   | 14   |   | 6  | 41   |     |    |       |       |

|     |                          |                                                         |        |           |       |      |   |      |      |     |    |       |       |
|-----|--------------------------|---------------------------------------------------------|--------|-----------|-------|------|---|------|------|-----|----|-------|-------|
| 324 | tr A2N011 A2N011_HUMAN   | Vhl1-D-J3-region (Fragment) OS=Homo sapiens             | 15986  | QVHLVQS   | 125   | 9.4  | - | 8    | 8    | 1   | 1  | 0.981 | 0.909 |
| 325 | tr B4DPQ3 B4DPQ3_HUMAN   | cDNA FLJ51034, highly similar to Vitamin K-dep          | 66152  | MAAGRR1   | 518   | 19   | 3 | 60   | 23   | 10  | 6  | 1.153 | 1.161 |
| 326 | tr V9GYG9 V9GYG9_HUMAN   | Apolipoprotein A-II (Fragment) OS=Homo sapiens          | 14103  | MKLLAAT   | 186   | 38.9 | 2 | 60   | 60   | 3   | 3  | 0.603 | 0.615 |
| 327 | sp P11021 GRP78_HUMAN    | 78 kDa glucose-regulated protein OS=Homo sapien         | 91263  | MKLSLVA   | 59    | 5.7  | - | 4    | 4    | 3   | 3  | 1.068 | 0.99  |
| 328 | tr B2R5S1 B2R5S1_HUMAN   | cDNA, FLJ92595, highly similar to Homo sapiens          | 60156  | MRKRAPQ   | 350   | 9.5  | 6 | 15   | 15   | 4   | 4  | 0.857 | 0.825 |
| 329 | tr A0A087WU91 A0A087WU9  | Protein IGHV3-49 OS=Homo sapiens GN=IGHV3               | 14625  | AILKGVCQ  | 59    | 17.5 | 2 | 5    | 5    | 2   | 2  | ---   | ---   |
| 330 | tr H0YAC1 H0YAC1_HUMAN   | Plasma kallikrein heavy chain (Fragment) OS=Homo sapien | 91778  | XSEDECEV  | 95    | 8.6  | 1 | 9    | 9    | 6   | 6  | 0.965 | 0.982 |
| 331 | sp Q06033 ITTH3_HUMAN    | Inter-alpha-trypsin inhibitor heavy chain H3 OS=H       | 118324 | MAFAWW    | 320   | 9.2  | - | 33   | 33   | 7   | 7  | 0.962 | 1.004 |
| 332 | sp Q8WZ8 OIT3_HUMAN      | Oncoprotein-induced transcript 3 protein OS=Homo sapien | 68290  | MPPFLLLI  | 100   | 4    | - | 7    | 7    | 2   | 2  | 1.26  | 0.993 |
| 333 | sp P15907 SIAT1_HUMAN    | Beta-galactoside alpha-2,6-sialyltransferase 1 OS=      | 58648  | MHTNLK1   | 46    | 3.7  | - | 1    | 1    | 1   | 1  | ---   | ---   |
| 334 | tr H0YM48 H0YM48_HUMAN   | ATP-dependent Clp protease ATP-binding subunit          | 37716  | MPSCGAC   | 21    | 2.6  | 2 | 1    | 1    | 1   | 1  | ---   | ---   |
| 335 | sp P05543 THBG_HUMAN     | Thyroxine-binding globulin OS=Homo sapiens GN           | 55459  | MSPLLY1   | 38    | 4.6  | - | 3    | 3    | 2   | 2  | ---   | ---   |
| 336 | tr E7ESK7 E7ESK7_HUMAN   | 14-3-3 protein zeta/delta (Fragment) OS=Homo sapien     | 20060  | MDKNELA   | 51    | 14.6 | 2 | 3    | 3    | 2   | 2  | ---   | ---   |
| 337 | tr B3L145 B3L145_HUMAN   | Sex hormone-binding globulin OS=Homo sapiens GN         | 41647  | MTFDLTK   | 39    | 12.5 | 1 | 9    | 9    | 4   | 4  | ---   | ---   |
| 338 | tr Q15430 Q15430_HUMAN   | Coagulation factor V (Fragment) OS=Homo sapien          | 29475  | PPESTVM   | 68    | 8.9  | - | 3    | 1    | 2   | 1  | ---   | ---   |
| 339 | tr F5H1C6 F5H1C6_HUMAN   | Ferritin family homolog 3 (Fragment) OS=Homo sapien     | 38768  | MAGMKT    | 46    | 7.7  | 1 | 3    | 3    | 2   | 2  | ---   | ---   |
| 340 | tr B2R608 B2R608_HUMAN   | cDNA, FLJ92718, highly similar to Homo sapiens          | 64480  | MGLQACL   | 24    | 3.7  | 5 | 3    | 3    | 2   | 2  | ---   | ---   |
| 341 | tr Q8ZD7 Q8ZD7_HUMAN     | Anti-thyroglobulin heavy chain variable region (Fr      | 15338  | QVQLQGS   | 38    | 6.9  | - | 1    | 1    | 1   | 1  | ---   | ---   |
| 342 | sp P33908 MA1A1_HUMAN    | Mannosyl-oligosaccharide 1,2-alpha-mannosidase          | 86231  | MPVGGLL   | 32    | 2.5  | - | 2    | 2    | 1   | 1  | ---   | ---   |
| 343 | tr G5E9W0 G5E9W0_HUMAN   | Phospholipase A1 member A OS=Homo sapiens GN            | 56514  | MHKSSSIV  | 30    | 3    | 1 | 2    | 2    | 2   | 2  | ---   | ---   |
| 344 | tr C0UY22 C0UY22_HUMAN   | Apolipoprotein B (Including Ag(X) antigen) OS=H         | 625263 | MDPPRPA   | 22843 | 45.3 | - | 2373 | 1080 | 198 | 94 | 0.397 | 0.395 |
| 345 | tr E1B4S7 E1B4S7_HUMAN   | Apolipoprotein B (Fragment) OS=Homo sapiens GN          | 30390  | PTVSSSM   | 1108  | 50   | - | 65   | 1    | 9   | 1  | ---   | ---   |
| 346 | tr Q6GMX6 Q6GMX6_HUMAN   | IGH@ protein OS=Homo sapiens GN=IGH@ PE=                | 62325  | MKHLWFI   | 3567  | 35.3 | - | 314  | 5    | 13  | 2  | ---   | ---   |
| 347 | tr D3DNU8 D3DNU8_HUMAN   | Kininogen 1, isoform CRA_a OS=Homo sapiens GN           | 59249  | MKLITLFL  | 208   | 25.1 | 3 | 31   | 31   | 10  | 10 | 0.835 | 0.757 |
| 348 | tr B4DVE1 B4DVE1_HUMAN   | cDNA FLJ53478, highly similar to Galectin-3-bim         | 70995  | MTPLRLFA  | 808   | 19.4 | 1 | 93   | 93   | 12  | 12 | 1.019 | 1.105 |
| 349 | tr A0A5E4 A0A5E4_HUMAN   | Uncharacterized protein OS=Homo sapiens PE=2            | 28363  | MAWMMI    | 1459  | 35.3 | - | 173  | 14   | 7   | 1  | 1.594 | 1.193 |
| 350 | sp Q13103 SP24_HUMAN     | Secreted phosphoprotein 24 OS=Homo sapiens GN           | 27041  | MISRMKEK  | 138   | 15.6 | - | 14   | 14   | 3   | 3  | 1.208 | 1.231 |
| 351 | tr B4E335 B4E335_HUMAN   | cDNA FLJ52842, highly similar to Actin, cytoplas        | 45627  | MDDDIAA   | 366   | 33.6 | 7 | 42   | 42   | 9   | 9  | 1.33  | 1.27  |
| 352 | tr X6RLJ0 X6RLJ0_HUMAN   | Complement C1q subcomponent subunit A (Fragm            | 27065  | MEGPRGV   | 58    | 11.8 | 1 | 8    | 8    | 3   | 3  | 1.178 | 1.254 |
| 353 | tr Q5T4F6 Q5T4F6_HUMAN   | Cartilage acidic protein 1 (Fragment) OS=Homo sapien    | 60780  | YALRDRQ   | 74    | 4.2  | 1 | 1    | 1    | 1   | 1  | ---   | ---   |
| 354 | tr B3KWZ6 B3KWZ6_HUMAN   | cDNA FLJ44343 fis, clone TRACH3005479, high             | 150152 | MAPEDKE   | 32    | 0.6  | 1 | 6    | 6    | 2   | 2  | ---   | ---   |
| 355 | tr B4DNS6 B4DNS6_HUMAN   | cDNA FLJ54278, highly similar to SPARC-like pr          | 71190  | MKTGLFF   | 116   | 9.6  | 4 | 13   | 13   | 4   | 4  | 1.336 | 1.124 |
| 356 | sp P13667 PDIA4_HUMAN    | Protein disulfide-isomerase A4 OS=Homo sapiens          | 93307  | MRPKAF    | 23    | 1.7  | - | 1    | 1    | 1   | 1  | ---   | ---   |
| 357 | tr Q6N095 Q6N095_HUMAN   | Putative uncharacterized protein DKFZp686K0315          | 63050  | MDWTWR    | 3542  | 25.1 | - | 308  | 2    | 10  | 1  | ---   | ---   |
| 358 | tr B3KU15 B3KU15_HUMAN   | Hyaluronidase OS=Homo sapiens PE=2 SV=1                 | 51312  | MAAHLFP   | 196   | 11.5 | 2 | 14   | 14   | 4   | 4  | 1.042 | 0.988 |
| 359 | tr A0A087WV47 A0A087WV4  | Ig gamma-1 chain C region OS=Homo sapiens GN            | 62206  | MELGLSV   | 4000  | 36.5 | 1 | 342  | 1    | 14  | 1  | ---   | ---   |
| 360 | sp P10720 PF4V_HUMAN     | Platelet factor 4 variant OS=Homo sapiens GN=PF         | 548    | -         | 49    | -    | - | 53   | 8    | 4   | 2  | 1.076 | 1.139 |
| 361 | tr A0A087WT59 A0A087WT5  | Transferrin OS=Homo sapiens GN=TTR PE=3                 | 23099  | MASHRLI   | 813   | 21.1 | 4 | 56   | 56   | 5   | 5  | 1.202 | 1.129 |
| 362 | sp P55056 APOC4_HUMAN    | Apolipoprotein C-IV OS=Homo sapiens GN=APO              | 17623  | MSLLRNR   | 288   | 20.5 | - | 35   | 35   | 3   | 3  | 0.708 | 0.668 |
| 363 | sp P1678 PERE_HUMAN      | Eosinophil peroxidase OS=Homo sapiens GN=EP             | 88347  | MHLPLP    | 43    | 3.9  | - | 8    | 1    | 3   | 1  | ---   | ---   |
| 364 | sp P06888 V109_HUMAN     | Ig lambda chain V-1 region EPS OS=Homo sapiens          | 13042  | QSVLTQP   | 39    | 14.7 | - | 2    | 1    | 2   | 1  | ---   | ---   |
| 365 | tr Q8ZZ5 Q8ZZ5_HUMAN     | Coagulation factor XII-Mie OS=Homo sapiens PE           | 76113  | MRALLLL   | 71    | 3.3  | 1 | 3    | 3    | 1   | 1  | 1.214 | 0.934 |
| 366 | tr Q0VAS5 Q0VAS5_HUMAN   | Histone H4 OS=Homo sapiens GN=HIST1H4H                  | 15015  | MSGRGKC   | 41    | 23.3 | 1 | 2    | 2    | 2   | 2  | ---   | ---   |
| 367 | tr D3DP13 D3DP13_HUMAN   | Fibrinogen beta chain, isoform CRA_c OS=Homo            | 48076  | MYLLKDL   | 199   | 24.4 | 3 | 19   | 19   | 8   | 8  | 1.334 | 0.857 |
| 368 | sp P02649 APOE_HUMAN     | Apolipoprotein E OS=Homo sapiens GN=APOE                | 40505  | MKVLVA    | 3398  | 64   | - | 373  | 325  | 23  | 21 | 1.17  | 1.149 |
| 369 | tr H0YJW9 H0YJW9_HUMAN   | Uncharacterized protein (Fragment) OS=Homo sapien       | 18921  | PGQVDAA   | 41    | 31.8 | - | 5    | 1    | 3   | 1  | ---   | ---   |
| 370 | tr A0A024R962 A0A024R962 | HCG40889, isoform CRA_b OS=Homo sapiens GN              | 168295 | MRLLAKII  | 2249  | 30.5 | 1 | 277  | 12   | 33  | 2  | 1.072 | 1.227 |
| 371 | sp Q4KW8 PLCH1_HUMAN     | 1-phosphatidylinositol 4,5-bisphosphate phosphodi       | 231978 | MADLEVY   | 30    | 0.5  | - | 1    | 1    | 1   | 1  | ---   | ---   |
| 372 | tr A0A024R5Z9 A0A024R5Z9 | Pyruvate kinase OS=Homo sapiens GN=PKM2                 | 70098  | MSKPHSE   | 56    | 4.9  | 6 | 3    | 3    | 3   | 3  | ---   | ---   |
| 373 | tr H0YDT2 H0YDT2_HUMAN   | Cathepsin W (Fragment) OS=Homo sapiens GN=C             | 27350  | ALTAHPS   | 29    | 6.2  | 2 | 1    | 1    | 1   | 1  | ---   | ---   |
| 374 | tr Q9UL88 Q9UL88_HUMAN   | Myosin-reactive immunoglobulin heavy chain vari         | 17289  | EVQLVES   | 71    | 19.8 | - | 6    | 4    | 2   | 1  | 1.031 | 0.992 |
| 375 | sp O43866 CD5L_HUMAN     | CD5 antigen-like OS=Homo sapiens GN=CD5L                | 44774  | MALLFSLI  | 484   | 43.8 | - | 37   | 37   | 12  | 12 | 1.081 | 1.02  |
| 376 | tr Q9UL84 Q9UL84_HUMAN   | Myosin-reactive immunoglobulin heavy chain vari         | 15510  | EVQLVES   | 60    | 14.8 | - | 3    | 1    | 2   | 1  | ---   | ---   |
| 377 | tr G3XAP6 G3XAP6_HUMAN   | Cartilage oligomeric matrix protein OS=Homo sapi        | 88600  | MLRELQE   | 51    | 1.4  | 8 | 5    | 5    | 1   | 1  | ---   | ---   |
| 378 | tr A0A0A0MSV6 A0A0A0MSV  | Complement C1q subcomponent subunit B (Fragm            | 29198  | MKIPWGS   | 760   | 23.1 | 2 | 63   | 63   | 6   | 6  | 0.976 | 0.873 |
| 379 | sp P06753 TPM3_HUMAN     | Tropomyosin alpha-3 chain OS=Homo sapiens GN            | 44851  | MMEAIKK   | 40    | 8.4  | - | 3    | 1    | 2   | 1  | ---   | ---   |
| 380 | tr Q5IWS5 Q5IWS5_HUMAN   | Intelectin 1 OS=Homo sapiens GN=ITLN1                   | 39480  | MNQLSFL   | 96    | 6.4  | 1 | 12   | 12   | 2   | 2  | 1.203 | 1.042 |
| 381 | tr Q59HB3 Q59HB3_HUMAN   | Apolipoprotein B variant (Fragment) OS=Homo sa          | 222441 | TIEGPLTSI | 7264  | 45   | - | 713  | 7    | 67  | 1  | 0.468 | 0.416 |
| 382 | tr A0A024QZL1 A0A024QZL1 | Proteoglycan 1, secretory granule, isoform CRA_a        | 19609  | MMQKLLI   | 60    | 8.2  | 1 | 3    | 3    | 1   | 1  | ---   | ---   |
| 383 | tr A0A087WSY5 A0A087WSY  | Carboxypeptidase B2 OS=Homo sapiens GN=CPE              | 51257  | MKLCSLA   | 157   | 18.7 | 1 | 22   | 22   | 7   | 7  | 1.064 | 0.768 |
| 384 | tr E1B2D1 E1B2D1_HUMAN   | Hemoglobin alpha-1 globin chain variant (Fragme         | 13799  | MVLSPAD   | 63    | 22   | 7 | 4    | 4    | 2   | 2  | ---   | ---   |
| 385 | tr A0A075B6K6 A0A075B6K6 | Protein IGLV4-3 OS=Homo sapiens GN=IGLV4-3              | 15013  | MAWVSF    | 22    | 13.9 | 1 | 4    | 4    | 2   | 2  | ---   | ---   |
| 386 | tr Q6MZL2 Q6MZL2_HUMAN   | Putative uncharacterized protein DKFZp686M056           | 38922  | NPGIYTC   | 103   | 12.8 | - | 10   | 9    | 4   | 3  | 1.362 | 1.527 |
| 387 | tr Q6P528 Q6P528_HUMAN   | ASPN protein OS=Homo sapiens GN=ASPN                    | 54606  | MKEYVLL   | 26    | 2.9  | 1 | 1    | 1    | 1   | 1  | ---   | ---   |
| 388 | tr D6RHH7 D6RHH7_HUMAN   | Corticotropin-releasing factor-binding protein OS=      | 30563  | MSPNFKL   | 48    | 8    | 1 | 4    | 4    | 2   | 2  | 1.539 | 1.112 |
| 389 | tr M0R009 M0R009_HUMAN   | Alpha-1B-glycoprotein (Fragment) OS=Homo sapi           | 37179  | LTCQAHL   | 103   | 14.7 | 1 | 11   | 11   | 5   | 5  | 0.994 | 0.965 |
| 390 | tr A0A0A0MRQ5 A0A0A0MR   | Peroxiredoxin-1 OS=Homo sapiens GN=PRDX1                | 14073  | MSSGNAK   | 29    | 8.2  | 5 | 1    | 1    | 1   | 1  | ---   | ---   |
| 391 | sp P02775 CXCL7_HUMAN    | Platelet basic protein OS=Homo sapiens GN=PPB           | 18429  | MSLRDLT   | 164   | 37.5 | - | 11   | 11   | 4   | 4  | 1.149 | 1.167 |

| A-VS-B@C A-VS-B@C A-VS-B@S A-VS-B@S |       |     |   | KEGG(ko_j GO Biologi GO Molecu GO Cellular_Component                                                                                                               |
|-------------------------------------|-------|-----|---|--------------------------------------------------------------------------------------------------------------------------------------------------------------------|
| -                                   | -     | -   | - | K01344 1 9: GO:000759 GO:000425 GO:0005788//endoplasmic reticulum lumen;GO:0005796//Golgi lumen;GO:0005576//extracellular region                                   |
| -                                   | -     | -   | - | K14462 1 0: GO:001088 GO:005075 GO:0030669//clathrin-coated endocytic vesicle membrane;GO:0034360//chylomicron remnant;GO:0005788//endoplasmic reticulum lumen     |
| -                                   | 4     | 4 * | * | K07605 1 0: GO:003298 GO:000520 GO:0005794//Golgi apparatus;GO:0045095//keratin filament                                                                           |
| -                                   | -     | -   | - | K04593 1 1: GO:000727 - GO:0005576//extracellular region                                                                                                           |
| 33                                  | 33 *  | -   | - | K08023 1 8: GO:001095 GO:001650 GO:0005615//extracellular space;GO:0005604//basement membrane                                                                      |
| -                                   | -     | -   | - | K11252 1 1: GO:000633 GO:000367 GO:0000786//nucleosome;GO:0005634//nucleus                                                                                         |
| 55                                  | 55 -  | -   | - | K03098 1 6: GO:004866 GO:003609 GO:0005783//endoplasmic reticulum;GO:0005615//extracellular space;GO:0022626//cytosolic ribosome;GO:0048471//perinuclear region    |
| 106                                 | 106 * | -   | - | K05399 1 0: GO:003272 GO:000510 GO:0005615//extracellular space                                                                                                    |
| 174                                 | 174 - | -   | - | K05316 1 8: GO:001095 GO:000486 GO:0005737//cytoplasm;GO:0005886//plasma membrane;GO:0005576//extracellular region                                                 |
| 2                                   | 2 -   | -   | - | K01172 1 1: GO:004866 GO:000550 GO:0030426//growth cone;GO:0005615//extracellular space;GO:0005605//basal lamina;GO:0032311//angiogenin-PR1 complex;GO:0005        |
| -                                   | -     | -   | - | K12472 1 4: GO:004801 GO:000508 GO:0005829//cytosol;GO:0030054//cell junction;GO:0043005//neuron projection;GO:0045202//synapse;GO:0005905//coated pit;GO:003      |
| -                                   | -     | -   | - | -                                                                                                                                                                  |
| 2                                   | 2 -   | -   | - | K08784 1 0: GO:003051 GO:000425 GO:0005615//extracellular space;GO:0031012//extracellular matrix;GO:0005829//cytosol                                               |
| 1                                   | 1 -   | -   | - | K06554 1 5: -                                                                                                                                                      |
| 15                                  | 14 -  | *   | * | K14611 1 7: GO:000257 - GO:0031093//platelet alpha granule lumen;GO:0005576//extracellular region                                                                  |
| 18                                  | 18 *  | *   | * | K14477 1 0: GO:000695 GO:003049 GO:0031838//haptoglobin-hemoglobin complex;GO:0034366//spherical high-density lipoprotein particle                                 |
| -                                   | -     | -   | - | K07937 1 9: GO:001603 GO:000505 GO:0000139//Golgi membrane;GO:0005829//cytosol;GO:0048471//perinuclear region of cytoplasm;GO:0005886//plasma membrane;GO:         |
| 1                                   | 1 -   | -   | - | - GO:000686 GO:000531 GO:0034362//low-density lipoprotein particle;GO:0034364//high-density lipoprotein particle                                                   |
| 2                                   | 2 -   | -   | - | K02727 1 3: GO:000020 GO:000551 GO:0005654//nucleoplasm;GO:0005829//cytosol;GO:0019773//proteasome core complex, alpha-subunit complex                             |
| 1                                   | 1 -   | -   | - | K06554 1 2: -                                                                                                                                                      |
| -                                   | -     | -   | - | K06554 1 2: -                                                                                                                                                      |
| 1                                   | 1 -   | -   | - | K06554 1 4: GO:004508 GO:000382 GO:0005886//plasma membrane;GO:0005576//extracellular region                                                                       |
| 1                                   | 1 -   | -   | - | K06553 1 5: -                                                                                                                                                      |
| 3                                   | 3 -   | -   | - | K03984 1 5: GO:001095 GO:000486 GO:0005576//extracellular region                                                                                                   |
| 3                                   | 3 -   | *   | * | - GO:000268 GO:000551 GO:0005615//extracellular space                                                                                                              |
| 2                                   | 2 -   | -   | - | K12258 1 0: GO:005072 GO:000510 GO:0005829//cytosol;GO:0005615//extracellular space;GO:0030424//axon;GO:0043202//lysosomal lumen;GO:0048471//perinuclear regi      |
| 14                                  | 14 *  | -   | - | K04524 1 9: GO:001087 GO:003121 GO:0042627//chylomicron;GO:0034361//very-low-density lipoprotein particle;GO:0034364//high-density lipoprotein particle;GO:000578  |
| 1                                   | 1 -   | -   | - | K06827 1 5: GO:000155 GO:000552 GO:0005615//extracellular space;GO:0005886//plasma membrane                                                                        |
| 50                                  | 50 -  | -   | - | K13624 1 0: GO:000682 GO:005108 GO:0005615//extracellular space                                                                                                    |
| 1                                   | 1 -   | -   | - | K06856 1 9: -                                                                                                                                                      |
| 2                                   | 2 -   | *   | * | - GO:003334 GO:000554 GO:0034362//low-density lipoprotein particle;GO:0034365//discoidal high-density lipoprotein particle;GO:0034361//very-low-density lip        |
| 5                                   | 4 -   | *   | * | K08130 1 3: - GO:0005576//extracellular region                                                                                                                     |
| -                                   | -     | -   | - | K12382 1 3: GO:000166 - GO:0042599//lamellar body;GO:0005764//lysosome;GO:0005771//multivesicular body;GO:0005615//extracellular space                             |
| 1                                   | 1 -   | -   | - | K06856 1 3: -                                                                                                                                                      |
| 21                                  | 21 -  | -   | - | K05502 1 7: GO:001095 GO:000820 GO:0005615//extracellular space;GO:0031012//extracellular matrix                                                                   |
| 3                                   | 3 *   | -   | - | K06856 1 2: -                                                                                                                                                      |
| 7                                   | 7 *   | *   | * | K13915 1 5: GO:004274 GO:000379 GO:0005615//extracellular space                                                                                                    |
| 2                                   | 2 *   | -   | - | K08632 1 1: GO:003019 GO:000202 GO:0005614//interstitial matrix                                                                                                    |
| -                                   | -     | -   | - | K02842 1 0: GO:000635 GO:000493 GO:0031527//filopodium membrane;GO:0016021//integral to membrane;GO:0009986//cell surface;GO:0048471//perinuclear region of cy     |
| 2                                   | 2 -   | -   | - | K01172 1 1: GO:000637 GO:000452 GO:0005576//extracellular region                                                                                                   |
| 1                                   | 1 -   | -   | - | K11275 1 1: GO:001658 GO:000367 GO:0005694//chromosome;GO:0005634//nucleus                                                                                         |
| 6                                   | 6 -   | -   | - | -                                                                                                                                                                  |
| 23                                  | 23 *  | *   | * | K01672 1 7: GO:000166 GO:004687 GO:0005615//extracellular space                                                                                                    |
| 10                                  | 10 -  | -   | - | K01127 1 0: GO:004306 GO:000462 GO:0005615//extracellular space;GO:0043231//intracellular membrane-bounded organelle;GO:0005578//proteinaceous extracellular matri |
| -                                   | -     | -   | - | K12499 1 1: GO:007144 GO:004362 GO:0005737//cytoplasm;GO:0005615//extracellular space                                                                              |
| 11                                  | 11 *  | *   | * | K04391 1 0: GO:000690 GO:007089 GO:0045121//membrane raft;GO:0005615//extracellular space;GO:0031225//anchored to membrane;GO:0009986//cell surface;GO:00058       |
| -                                   | -     | -   | - | K06554 1 6: -                                                                                                                                                      |
| 2                                   | 2 -   | -   | - | K05502 1 0: GO:000662 GO:000827 GO:0031988//membrane-bounded vesicle;GO:0005581//collagen;GO:0005615//extracellular space                                          |
| 5                                   | 5 -   | -   | - | K01059 1 0: GO:003437 GO:000446 GO:0042627//chylomicron;GO:0009986//cell surface;GO:0031012//extracellular matrix;GO:0034361//very-low-density lipoprotein partic  |
| 8                                   | 8 *   | -   | - | K08648 1 0: GO:000715 GO:000553 GO:0005615//extracellular space                                                                                                    |
| 4                                   | 4 *   | *   | * | - GO:000609 GO:003463 GO:0005615//extracellular space                                                                                                              |
| 19                                  | 20 *  | -   | - | K03908 1 0: GO:003016 GO:000550 GO:0000139//Golgi membrane;GO:0031093//platelet alpha granule lumen;GO:0005789//endoplasmic reticulum membrane;GO:0005576//        |
| 4                                   | 4 -   | -   | - | K01327 1 2: GO:004211 GO:000425 GO:0042582//azurophil granule;GO:0005576//extracellular region                                                                     |
| -                                   | -     | -   | - | K06554 1 6: -                                                                                                                                                      |
| 1                                   | 1 -   | -   | - | K06554 1 6: GO:004508 GO:000382 GO:0005886//plasma membrane;GO:0005576//extracellular region                                                                       |
| -                                   | -     | -   | - | K14678 1 0: GO:001827 - GO:0005576//extracellular region;GO:0031012//extracellular matrix                                                                          |
| -                                   | -     | -   | - | K10352 1 0: GO:003022 GO:004280 GO:0005826//actomyosin contractile ring;GO:0001772//immunological synapse;GO:0031594//neuromuscular junction;GO:0005829//cyto      |
| 1                                   | 1 -   | -   | - | K07604 1 0: GO:001021 GO:000551 GO:0005829//cytosol;GO:0005739//mitochondrion;GO:0005730//nucleolus;GO:0071944//cell periphery;GO:0045095//keratin filament        |
| 17                                  | 17 -  | -   | - | K01045 1 0: GO:004639 GO:004687 GO:0005615//extracellular space                                                                                                    |
| 1                                   | 1 -   | -   | - | K07375 1 0: GO:004226 GO:000552 GO:0045298//tubulin complex;GO:0005829//cytosol;GO:0005874//microtubule;GO:0005634//nucleus                                        |
| 9                                   | 9 -   | *   | * | K01774 1 1: GO:000905 GO:000406 GO:0016021//integral to membrane;GO:0009986//cell surface                                                                          |
| 1                                   | 1 -   | -   | - | K01350 1 8: GO:009702 GO:001989 GO:0005829//cytosol;GO:0031012//extracellular matrix;GO:0005886//plasma membrane                                                   |
| 4                                   | 4 -   | -   | - | K04667 1 0: GO:004000 GO:000808 GO:0005576//extracellular region                                                                                                   |
| -                                   | -     | -   | - | K06856 1 1: -                                                                                                                                                      |
| -                                   | -     | -   | - | K10373 1 1: GO:003461 GO:004280 GO:0032059//bleb;GO:0005862//muscle thin filament tropomyosin;GO:0005829//cytosol;GO:0031941//filamentous actin;GO:0001725//s      |
| 3                                   | 3 -   | -   | - | K03982 1 0: GO:000717 GO:000486 GO:0005615//extracellular space;GO:0005886//plasma membrane;GO:0031093//platelet alpha granule lumen;GO:0031012//extracellular     |
| 26                                  | 26 *  | -   | - | K03984 1 0: GO:003398 GO:000486 GO:0005615//extracellular space;GO:0031093//platelet alpha granule lumen;GO:0005578//proteinaceous extracellular matrix            |
| 15                                  | 15 -  | -   | - | K00518 1 6: GO:004668 GO:000820 GO:0005615//extracellular space;GO:0031012//extracellular matrix;GO:0005634//nucleus;GO:0005829//cytosol;GO:0005802//trans-Gol     |
| -                                   | -     | -   | - | K03989 1 1: GO:000695 GO:000486 GO:0005615//extracellular space;GO:0005886//plasma membrane                                                                        |
| -                                   | -     | -   | - | K10847 1 4: -                                                                                                                                                      |
| 21                                  | 22 -  | -   | - | K00650 1 0: GO:004215 GO:000460 GO:0034364//high-density lipoprotein particle                                                                                      |
| 2                                   | 2 -   | -   | - | K05604 1 0: GO:000650 GO:004687 GO:0005576//extracellular region                                                                                                   |
| -                                   | -     | -   | - | K06249 1 0: GO:002176 GO:007032 GO:0005615//extracellular space;GO:0005737//cytoplasm;GO:0005578//proteinaceous extracellular matrix;GO:0030425//dendrite          |
| -                                   | -     | -   | - | K06856 1 7: -                                                                                                                                                      |
| 59                                  | 59 -  | -   | - | K03989 1 2: GO:000695 GO:000486 GO:0005615//extracellular space;GO:0005886//plasma membrane                                                                        |
| 25                                  | 25 *  | -   | - | K04003 1 2: GO:000695 - GO:0005576//extracellular region;GO:0005886//plasma membrane                                                                               |
| -                                   | -     | -   | - | K06554 1 7: -                                                                                                                                                      |
| 4                                   | 4 -   | *   | * | K04004 1 8: GO:000686 GO:000531 GO:0005615//extracellular space                                                                                                    |
| 17                                  | 17 *  | *   | * | K05399 1 1: GO:004369 GO:001712 GO:0031982//vesicle;GO:0034364//high-density lipoprotein particle                                                                  |
| 3                                   | 3 -   | -   | - | K04525 1 0: GO:001095 GO:000486 GO:0005576//extracellular region;GO:0005634//nucleus                                                                               |
| 2                                   | 2 -   | -   | - | K13375 1 0: GO:000717 GO:000808 GO:0030424//axon;GO:0043025//neuronal cell body;GO:0005902//microvillus;GO:0005796//Golgi lumen;GO:0009986//cell surface;GO        |
| 1                                   | 1 -   | -   | - | K00683 1 7: GO:000650 GO:001660 GO:0005576//extracellular region                                                                                                   |
| 5                                   | 4 *   | *   | * | - GO:001026 GO:000843 GO:0005615//extracellular space                                                                                                              |
| 2                                   | 2 -   | -   | - | - GO:000828 GO:0005615//extracellular space                                                                                                                        |
| 2                                   | 2 *   | -   | - | K03996 1 0: GO:000695 - GO:0005579//membrane attack complex;GO:0005576//extracellular region                                                                       |
| 1                                   | 1 -   | -   | - | K08767 1 4: GO:000663 GO:000517 GO:0005615//extracellular space                                                                                                    |
| 21                                  | 21 *  | *   | * | K04004 1 1: GO:000695 - GO:0005576//extracellular region                                                                                                           |
| 1                                   | 1 -   | -   | - | K06554 1 2: -                                                                                                                                                      |
| -                                   | -     | -   | - | K06554 1 2: -                                                                                                                                                      |
| -                                   | -     | -   | - | K06856 1 6: -                                                                                                                                                      |
| -                                   | -     | -   | - | K10031 1 1: GO:007009 GO:004523 GO:0005615//extracellular space;GO:0009897//external side of plasma membrane                                                       |
| 12                                  | 12 -  | -   | - | K15412 1 0: GO:004274 - GO:0005615//extracellular space;GO:0031012//extracellular matrix                                                                           |
| 1                                   | 1 -   | -   | - | K03386 1 1: GO:004274 GO:000837 GO:0005829//cytosol;GO:0005739//mitochondrion                                                                                      |
| 1                                   | 1 -   | -   | - | K03906 1 0: GO:000759 - GO:0005576//extracellular region                                                                                                           |
| 5                                   | 1 -   | -   | - | K06554 1 1: -                                                                                                                                                      |
| -                                   | -     | -   | - | K06856 1 2: -                                                                                                                                                      |
| 50                                  | 51 *  | *   | * | K05407 1 2: GO:001652 GO:000820 GO:0031093//platelet alpha granule lumen;GO:0005615//extracellular space                                                           |
| 9                                   | 9 *   | *   | * | K09025 1 0: GO:004572 GO:005075 GO:0042627//chylomicron;GO:0034361//very-low-density lipoprotein particle;GO:0034364//high-density lipoprotein particle;GO:003436  |
| 1                                   | 1 -   | -   | - | K01046 1 0: GO:000663 GO:000462 GO:0034364//high-density lipoprotein particle                                                                                      |
| 197                                 | 197 - | -   | - | K08760 1 0: GO:0009986//cell surface;GO:0034364//high-density lipoprotein particle;GO:0042627//chylomicron;GO:0005788//endoplasmic reticulum                       |
| 5                                   | 3 -   | *   | * | K04001 1 2: GO:003016 GO:000551 GO:0031093//platelet alpha granule lumen;GO:0005615//extracellular space                                                           |
| 1                                   | 1 -   | -   | - | K02731 1 8: GO:000020 GO:000429 GO:0005654//nucleoplasm;GO:0005829//cytosol;GO:0019773//proteasome core complex, alpha-subunit complex                             |
| 9                                   | 9 -   | -   | - | K09580 1 0: GO:000666 GO:000375 GO:0005793//endoplasmic reticulum-Golgi intermediate compartment;GO:0009986//cell surface;GO:0042470//melanosome;GO:0005788        |
| -                                   | -     | -   | - | K15288 1 1: -                                                                                                                                                      |
| 21                                  | 22 *  | -   | - | K07605 1 0: GO:000697 GO:000487 GO:0045095//keratin filament;GO:0005886//plasma membrane                                                                           |

|     |     |   |   |                                                                                                                                                                      |
|-----|-----|---|---|----------------------------------------------------------------------------------------------------------------------------------------------------------------------|
| 19  | 19  | - | - | K03903 1 0. GO:003016 GO:003067 GO:0009897//external side of plasma membrane;GO:0031093//platelet alpha granule lumen;GO:0005938//cell cortex;GO:0005577//fibrin     |
| 1   | 1   | - | - | K05699 1 0. GO:003016 GO:000517 GO:0005925//focal adhesion;GO:0031143//pseudopodium;GO:0031093//platelet alpha granule lumen;GO:0005576//extracellular region;C      |
| 1   | 1   | - | - | - GO:000859 GO:000820 GO:0005578//proteinaceous extracellular matrix                                                                                                 |
| 1   | 1   | - | - | - GO:003016 GO:000550 GO:0033018//saroplasmic reticulum lumen;GO:0042470//melanosome;GO:0005576//extracellular region;GO:0005794//Golgi apparatus                    |
| 191 | 191 | - | - | - GO:006107 GO:003162 GO:0034366//spherical high-density lipoprotein particle;GO:0031093//platelet alpha granule lumen;GO:0031966//mitochondrial membran             |
| -   | -   | - | - | K06856 1 2. -                                                                                                                                                        |
| 5   | 5   | - | - | - GO:005088 GO:000550 GO:0030658//transport vesicle membrane;GO:0030141//secretory granule;GO:0005576//extracellular region                                          |
| -   | -   | - | - | K06856 1 1. -                                                                                                                                                        |
| 3   | 3   | - | - | K10138 1 2. GO:004434 GO:000552 GO:0005615//extracellular space                                                                                                      |
| 5   | 5   | - | * | K06554 1 2. -                                                                                                                                                        |
| 26  | 26  | - | * | - GO:000196 GO:000487 GO:0005615//extracellular space;GO:0005578//proteinaceous extracellular matrix                                                                 |
| 2   | 2   | - | - | K06856 1 8. -                                                                                                                                                        |
| 3   | 3   | - | - | K06826 1 0. GO:000716 GO:004323 GO:0005605//basal lamina;GO:0071944//cell periphery                                                                                  |
| 7   | 7   | - | - | K01446 1 0. GO:003282 GO:000827 GO:0005622//intracellular;GO:0005576//extracellular region;GO:0016020//membrane                                                      |
| 1   | 1   | - | - | K06831 1 7. GO:000838 GO:001986 GO:0005681//spliceosomal complex;GO:0005743//mitochondrial inner membrane;GO:0005578//proteinaceous extracellular matrix;GO:00       |
| 9   | 9   | - | * | K09644 1 0. GO:003016 GO:000425 GO:0031093//platelet alpha granule lumen;GO:0034358//plasma lipoprotein particle;GO:0031232//extrinsic to external side of plasma me |
| 8   | 8   | - | * | K14736 1 0. GO:005508 GO:000819 GO:0030141//secretory granule;GO:0009925//basal plasma membrane;GO:0005739//mitochondrion;GO:0030139//endocytic vesicle;GO:(         |
| 15  | 14  | - | * | K03905 1 0. GO:003016 GO:003067 GO:0009897//external side of plasma membrane;GO:0031093//platelet alpha granule lumen;GO:0005938//cell cortex;GO:0005577//fibrin     |
| 4   | 4   | - | * | K06260 1 0. GO:000716 GO:000551 GO:0005887//integral to plasma membrane;GO:0009986//cell surface                                                                     |
| 9   | 8   | - | * | K07296 1 4. GO:003303 GO:004349 GO:0005783//endoplasmic reticulum;GO:0005615//extracellular space;GO:0071944//cell periphery;GO:0048471//perinuclear region of cy    |
| 1   | 1   | - | - | K08023 1 4. GO:001904 GO:000520 GO:0005615//extracellular space;GO:0005578//proteinaceous extracellular matrix                                                       |
| 3   | 3   | - | - | K08627 1 0. GO:003016 GO:000827 GO:0005615//extracellular space;GO:0009986//cell surface;GO:0005578//proteinaceous extracellular matrix                              |
| 18  | 18  | - | * | K03983 1 0. GO:000203 GO:004280 GO:0005577//fibrinogen complex;GO:0031093//platelet alpha granule lumen                                                              |
| 1   | 1   | - | - | K05717 1 0. GO:001095 GO:001650 GO:0016324//apical plasma membrane;GO:0005604//basement membrane                                                                     |
| 29  | 29  | - | - | - GO:004295 GO:006023 GO:0042627//chylomicron;GO:0034366//spherical high-density lipoprotein particle;GO:0034361//very-low-density lipoprotein particle;G            |
| 1   | 1   | - | - | K06856 1 4. -                                                                                                                                                        |
| -   | -   | - | - | -                                                                                                                                                                    |
| -   | -   | - | - | K06554 1 5. GO:004508 GO:000382 GO:0005886//plasma membrane;GO:0005576//extracellular region                                                                         |
| 10  | 10  | - | - | K03997 1 0. GO:000695 - GO:0005615//extracellular space;GO:0005579//membrane attack complex                                                                          |
| 7   | 7   | - | * | - GO:003016 GO:000166 GO:0034364//high-density lipoprotein particle                                                                                                  |
| 7   | 6   | - | * | K08023 1 1. GO:001810 GO:000550 GO:0005615//extracellular space;GO:0005578//proteinaceous extracellular matrix                                                       |
| 39  | 39  | - | - | K06856 1 1. -                                                                                                                                                        |
| 1   | 1   | - | - | -                                                                                                                                                                    |
| 2   | 2   | - | - | K10375 1 2. GO:000697 GO:000830 GO:0005829//cytosol;GO:0030863//cortical cytoskeleton;GO:0002102//podosome;GO:0001725//stress fiber;GO:0005862//muscle thin fil      |
| 1   | 1   | - | - | K05717 1 0. GO:000152 GO:001650 GO:0005604//basement membrane;GO:0005793//endoplasmic reticulum-Golgi intermediate compartment;GO:0031093//platelet alpha gra        |
| 35  | 35  | - | * | K01045 1 0. GO:001087 GO:000406 GO:0034366//spherical high-density lipoprotein particle                                                                              |
| -   | -   | - | - | K08672 1 0. GO:000735 GO:004349 GO:0005796//Golgi lumen;GO:0005615//extracellular space;GO:0009986//cell surface;GO:0012505//endomembrane system;GO:003101           |
| 2   | 2   | - | - | K05717 1 8. GO:000152 GO:001650 GO:0005604//basement membrane;GO:0005793//endoplasmic reticulum-Golgi intermediate compartment;GO:0031093//platelet alpha gra        |
| 5   | 5   | - | * | - GO:000268 GO:000551 GO:0005615//extracellular space                                                                                                                |
| 1   | 1   | - | - | - GO:000635 GO:000367 GO:0005576//extracellular region;GO:0005634//nucleus                                                                                           |
| -   | -   | - | - | K09631 1 0. GO:000650 GO:000425 GO:0005615//extracellular space;GO:0005791//rough endoplasmic reticulum                                                              |
| -   | -   | - | - | K06856 1 1. GO:000695 GO:000382 GO:0005576//extracellular region;GO:0016021//integral to membrane;GO:0005886//plasma membrane                                        |
| 1   | 1   | - | - | K03984 1 4. GO:001095 GO:000486 GO:0005576//extracellular region                                                                                                     |
| -   | -   | - | - | -                                                                                                                                                                    |
| 85  | 85  | - | - | K04861 1 2. GO:003021 GO:000486 GO:0005576//extracellular region                                                                                                     |
| 1   | 1   | - | - | K05656 1 1. GO:000191 GO:004697 GO:0042825//TAP complex;GO:0005743//mitochondrial inner membrane;GO:0005765//lysosomal membrane;GO:0005769//early endoso             |
| 1   | 1   | - | - | K06554 1 7. -                                                                                                                                                        |
| 307 | 307 | - | - | K01313 1 0. GO:000759 GO:000808 GO:0005788//endoplasmic reticulum lumen;GO:0005615//extracellular space;GO:0005886//plasma membrane;GO:0005796//Golgi lumen          |
| 3   | 4   | - | * | K06251 1 3. GO:000695 GO:003024 GO:0005576//extracellular region;GO:00016021//integral to membrane                                                                   |
| 1   | 1   | - | - | K06856 1 3. -                                                                                                                                                        |
| -   | -   | - | - | K04524 1 3. GO:000664 GO:005075 GO:0031232//extrinsic to external side of plasma membrane;GO:0034364//high-density lipoprotein particle;GO:0042627//chylomicron;G    |
| 1   | 1   | - | - | K06554 1 4. -                                                                                                                                                        |
| 2   | 2   | - | - | K04659 1 0. GO:001652 GO:007005 GO:0005577//fibrinogen complex;GO:0009897//external side of plasma membrane;GO:0031093//platelet alpha granule lumen;GO:00310        |
| -   | -   | - | - | - GO:006028 - GO:0005737//cytoplasm;GO:0005929//cilium                                                                                                               |
| 20  | 20  | - | * | K03993 1 0. GO:000695 GO:000425 GO:0005576//extracellular region                                                                                                     |
| 1   | 1   | - | - | K07860 1 4. GO:000741 GO:000552 GO:0005829//cytosol;GO:0005635//nuclear envelope;GO:0005886//plasma membrane                                                         |
| 112 | 112 | - | * | K04002 1 0. GO:004508 GO:000551 GO:0005737//cytoplasm;GO:0005886//plasma membrane;GO:0005576//extracellular region                                                   |
| -   | -   | - | - | - GO:006048 GO:000551 GO:0005730//nucleolus;GO:0000922//spindle pole;GO:0005876//spindle microtubule;GO:0005694//chromosome;G                                        |
| 1   | 1   | - | - | K04525 1 2. GO:001095 GO:000486 GO:0005737//cytoplasm;GO:0005576//extracellular region;GO:0016020//membrane                                                          |
| 2   | 2   | - | - | K08023 1 0. GO:003558 GO:000502 GO:0005578//proteinaceous extracellular matrix                                                                                       |
| -   | -   | - | - | K07249 1 0. GO:003232 GO:000549 GO:0005829//cytosol                                                                                                                  |
| 2   | 2   | - | - | K01333 1 0. GO:000695 GO:000504 GO:0005615//extracellular space;GO:0016020//membrane                                                                                 |
| 676 | 676 | - | - | K03990 1 0. GO:000250 GO:003171 GO:0005615//extracellular space;GO:0005886//plasma membrane                                                                          |
| 87  | 87  | - | - | K08759 1 6. GO:000718 GO:001548 GO:0042627//chylomicron;GO:0034366//spherical high-density lipoprotein particle;GO:0034361//very-low-density lipoprotein particle;G  |
| 1   | 1   | - | - | K06554 1 6. -                                                                                                                                                        |
| -   | -   | - | - | - GO:003016 GO:000166 GO:0034364//high-density lipoprotein particle                                                                                                  |
| 55  | 56  | - | * | K03994 1 0. GO:003360 GO:003171 GO:0005579//membrane attack complex;GO:0005615//extracellular space                                                                  |
| 3   | 3   | - | - | K10138 1 7. GO:000698 GO:000552 GO:0005615//extracellular space                                                                                                      |
| -   | -   | - | - | K06856 1 4. -                                                                                                                                                        |
| 1   | 1   | - | - | K10162 1 0. GO:003444 GO:000384 GO:0034362//low-density lipoprotein particle                                                                                         |
| 43  | 43  | - | * | K00432 1 1. GO:004274 GO:000460 GO:0005615//extracellular space                                                                                                      |
| 9   | 9   | - | * | K03992 1 0. GO:000650 GO:000550 GO:0005615//extracellular space                                                                                                      |
| -   | -   | - | - | K06856 1 2. GO:000695 GO:000382 GO:0005576//extracellular region;GO:0016021//integral to membrane;GO:0005886//plasma membrane                                        |
| 3   | 3   | - | * | - GO:002241 GO:000487 GO:0005788//endoplasmic reticulum membrane;GO:0005886//plasma membrane;GO:0016021//integral to membrane;GO:0005576//extra                      |
| 7   | 7   | - | - | K03909 1 2. GO:004216 GO:000486 GO:0005576//extracellular region;GO:0005886//plasma membrane                                                                         |
| 2   | 2   | - | - | K04667 1 0. GO:004000 GO:000808 GO:0005576//extracellular region                                                                                                     |
| -   | -   | - | - | K10360 1 6. GO:003285 GO:000507 GO:0005829//cytosol;GO:0043231//intracellular membrane-bounded organelle;GO:0001726//ruffle;GO:0005886//plasma membrane              |
| 1   | 1   | - | - | - GO:003439 GO:000550 GO:0005615//extracellular space;GO:0005578//proteinaceous extracellular matrix;GO:0005737//cytoplasm;GO:0016020//membrane;GO:                  |
| 8   | 8   | - | * | K06238 1 0. GO:000741 GO:000486 GO:0030133//transport vesicle;GO:0005615//extracellular space;GO:0005788//endoplasmic reticulum lumen;GO:0042383//sarcolemma;C       |
| -   | -   | - | - | K06554 1 5. -                                                                                                                                                        |
| 5   | 4   | - | * | - GO:000695 GO:000382 GO:0005576//extracellular region                                                                                                               |
| 1   | 1   | - | - | K06554 1 6. -                                                                                                                                                        |
| 103 | 103 | - | - | K03902 1 0. GO:003016 GO:000550 GO:0005615//extracellular space;GO:0031093//platelet alpha granule lumen;GO:0005886//plasma membrane                                 |
| 27  | 27  | - | - | K01330 1 0. GO:004508 GO:000425 GO:0005576//extracellular region                                                                                                     |
| 2   | 2   | - | - | K11251 1 9. GO:000633 GO:000367 GO:0000786//nucleosome;GO:0005634//nucleus                                                                                           |
| 6   | 6   | - | * | K10789 1 0. GO:000695 GO:004687 GO:0005764//lysosome;GO:0030141//secretory granule;GO:0005615//extracellular space;GO:0005634//nucleus                               |
| 31  | 31  | - | * | K03900 1 0. GO:003016 GO:004748 GO:0009897//external side of plasma membrane;GO:0033093//Weibel-Palade body;GO:0005578//proteinaceous extracellular matrix;GO:       |
| 70  | 70  | - | - | K04000 1 0. GO:001983 - GO:0005579//membrane attack complex;GO:0005576//extracellular region                                                                         |
| 2   | 2   | - | * | K06554 1 5. -                                                                                                                                                        |
| -   | -   | - | - | K01319 1 1. GO:007094 GO:000425 GO:0030141//secretory granule;GO:0005615//extracellular space;GO:0009986//cell surface;GO:0031012//extracellular matrix;GO:00058     |
| 1   | 1   | - | - | K06238 1 2. GO:003444 GO:004687 GO:0031258//lamellipodium membrane;GO:0016021//integral to membrane;GO:0031527//filopodium membrane                                  |
| 19  | 18  | - | * | K01883 1 5. GO:005118 GO:000843 GO:0005615//extracellular space                                                                                                      |
| 448 | 448 | - | - | K06251 1 0. GO:003209 GO:000517 GO:0005615//extracellular space;GO:0071062//alphav-beta3 integrin-vitronectin complex;GO:0031012//extracellular matrix               |
| 7   | 7   | - | - | K14477 1 6. GO:000695 GO:003049 GO:0005615//extracellular space;GO:0031838//haptoglobin-hemoglobin complex                                                           |
| 2   | 2   | - | - | K06271 1 0. GO:000741 GO:003027 GO:0005925//focal adhesion;GO:0005911//cell-cell junction;GO:0032587//ruffle membrane;GO:0043231//intracellular membrane-bound       |
| -   | -   | - | - | K06856 1 5. -                                                                                                                                                        |
| -   | -   | - | - | K06825 1 0. GO:003558 GO:000550 GO:0005604//basement membrane;GO:0005615//extracellular space;GO:0001527//microfibril                                                |
| -   | -   | - | - | K13073 1 0. - GO:0005576//extracellular region;GO:0005887//integral to plasma membrane;GO:0055038//recycling endosome membrane;GO:0030133/                           |
| -   | -   | - | - | K05901 1 8. GO:004428 GO:004260 GO:0005829//cytosol                                                                                                                  |
| 7   | 7   | - | * | K03989 1 3. GO:000695 GO:000486 GO:0005615//extracellular space;GO:0005886//plasma membrane                                                                          |
| 1   | 1   | - | - | K06554 1 1. -                                                                                                                                                        |
| -   | -   | - | - | K03996 1 0. GO:000695 - GO:0005579//membrane attack complex;GO:0005576//extracellular region                                                                         |
| -   | -   | - | - | K08288 1 0. GO:000724 GO:000508 GO:0005788//endoplasmic reticulum lumen                                                                                              |
| 14  | 14  | - | * | K10104 1 7. GO:000822 GO:000382 GO:0005615//extracellular space;GO:0005581//collagen                                                                                 |
| -   | -   | - | - | K01323 1 0. GO:000759 GO:000551 GO:0005615//extracellular space;GO:0005886//plasma membrane                                                                          |
| 48  | 48  | - | * | K10104 1 2. GO:000716 GO:003024 GO:0005615//extracellular space;GO:0005581//collagen                                                                                 |
| -   | -   | - | - | K10414 1 0. GO:003090 GO:000377 GO:0035085//cilium axoneme;GO:0005829//cytosol;GO:0030286//microtubule;GO:0005874//microtubule;GO:0031512//motile prima              |
| 1   | 1   | - | - | - GO:000693 - GO:0005737//cytoplasm;GO:0005615//extracellular space                                                                                                  |
| 603 | 603 | - | - | K08757 1 1. GO:007050 GO:000554 GO:0030139//endocytic vesicle;GO:0005788//endoplasmic reticulum lumen;GO:0005886//plasma membrane;GO:0030141//secretory gran         |



|     |     |   |   |             |                                                                                                                                                                      |
|-----|-----|---|---|-------------|----------------------------------------------------------------------------------------------------------------------------------------------------------------------|
| 1   | 1   | - | - | K06553 1 9- | -                                                                                                                                                                    |
| 1   | 1   | - | - | K05460 1 1: | GO:000156 GO:000425 GO:0005576/extracellular region;GO:0005829/cytosol;GO:0005634/nucleus                                                                            |
| 8   | 8   | * | - | K00134 1 3: | GO:0005140 GO:0005128 GO:0005829/cytosol;GO:0015630/microtubule cytoskeleton;GO:0048471/perinuclear region of cytoplasm;GO:0005811/lipid particle;C                  |
| 1   | 1   | - | - | K06856 1 2- | -                                                                                                                                                                    |
| -   | -   | - | - | K06856 1 3- | -                                                                                                                                                                    |
| -   | -   | - | - | K01106 1 3: | GO:000741 GO:000852 GO:0016021/integral to membrane;GO:0005737/cytoplasm                                                                                             |
| 347 | 347 | - | - | K03911 1 0: | GO:0005511 GO:000486 GO:0005615/extracellular space;GO:0005971/ribonucleoside-diphosphate reductase complex;GO:0005886/plasma membrane                               |
| 6   | 6   | * | - | K04659 1 0: | GO:001652 GO:007005 GO:0005577/fibrinogen complex;GO:0009897/external side of plasma membrane;GO:0031093/platelet alpha granule lumen;GO:0031012/extracellular space |
| -   | -   | - | - | K06554 1 2- | -                                                                                                                                                                    |
| 1   | 1   | - | - | K05689 1 0: | GO:007097 GO:003050 GO:0009986/cell surface;GO:0016235/aggresome;GO:0043296/apical junction complex;GO:0005925/focal adhesion;GO:0005802/tra                         |
| 20  | 20  | - | - | K06554 1 2: | GO:004508 GO:000382 GO:0005886/plasma membrane;GO:0005576/extracellular region                                                                                       |
| 1   | 1   | - | - | K05635 1 0: | GO:001647 GO:004320 GO:0043260/laminin-11 complex;GO:0005606/laminin-1 complex;GO:0005615/extracellular space;GO:0043259/laminin-10 complex                          |
| -   | -   | - | - | K06856 1 1- | -                                                                                                                                                                    |
| 3   | 3   | * | - | K07604 1 1: | GO:000728 GO:000520 GO:0045095/keratin filament;GO:0048471/perinuclear region of cytoplasm                                                                           |
| 1   | 1   | - | - | K00726 1 0: | GO:001827 GO:004687 GO:0016021/integral to membrane;GO:0000139/Golgi membrane                                                                                        |
| 25  | 25  | * | - | K03988 1 9: | GO:000695 - GO:0005581/collagen                                                                                                                                      |
| -   | -   | - | - | K01292 1 0: | GO:000662 GO:000418 GO:0005615/extracellular space                                                                                                                   |
| 7   | 7   | * | - | K06856 1 8- | -                                                                                                                                                                    |
| 1   | 1   | - | - | K04355 1 6: | GO:001404 GO:000808 GO:0016023/cytoplasmic membrane-bounded vesicle;GO:0005576/extracellular region                                                                  |
| 1   | 1   | - | - | K08124 1 0: | GO:004234 - GO:0043202/lysosomal lumen;GO:0005796/Golgi lumen;GO:0005578/proteinaceous extracellular matrix                                                          |
| 14  | 14  | * | - | K07604 1 0: | GO:007127 GO:003028 GO:0005737/cytoplasm;GO:0045095/keratin filament                                                                                                 |
| 9   | 9   | * | - | K08136 1 3: | GO:007136 GO:000550 GO:0005604/basement membrane;GO:0005615/extracellular space;GO:0031093/platelet alpha granule lumen;GO:0005634/nucleus                           |
| 5   | 5   | * | - | K03989 1 0: | GO:000695 GO:000486 GO:0005615/extracellular space;GO:0005886/plasma membrane                                                                                        |
| 26  | 26  | * | - | K14736 1 0: | GO:004274 GO:000819 GO:0030141/secretory granule;GO:0097013/phagocytic vesicle lumen;GO:0005576/extracellular region                                                 |
| 13  | 13  | - | - | K03999 1 2: | GO:000695 GO:001984 GO:0005615/extracellular space;GO:0005579/membrane attack complex                                                                                |
| 8   | 8   | - | - | K06554 1 5- | -                                                                                                                                                                    |
| 2   | 2   | - | - | K04004 1 3- | - GO:0005576/extracellular region                                                                                                                                    |
| 1   | 1   | - | - | K03103 1 0: | GO:003028 GO:000399 GO:0005788/endoplasmic reticulum lumen                                                                                                           |
| 5   | 4   | - | - | K10044 1 1: | GO:005087 GO:000510 GO:0031012/extracellular matrix;GO:0005576/extracellular region                                                                                  |
| 21  | 21  | - | - | K01335 1 0: | GO:000695 GO:000425 GO:0005886/plasma membrane;GO:0005576/extracellular region                                                                                       |
| 7   | 7   | - | - | -           | GO:003016 GO:000166 GO:0034364/high-density lipoprotein particle                                                                                                     |
| 3   | 3   | * | - | K03898 1 8- | - GO:0005576/extracellular region                                                                                                                                    |
| 29  | 29  | * | - | K03989 1 0: | GO:000695 GO:000486 GO:0005615/extracellular space;GO:0005886/plasma membrane                                                                                        |
| 26  | 26  | * | - | K01331 1 0: | GO:004508 GO:000425 GO:0005576/extracellular region                                                                                                                  |
| 56  | 56  | - | - | K01672 1 2: | GO:000645 GO:004687 GO:0005615/extracellular space;GO:0043234/protein complex;GO:0031012/extracellular matrix                                                        |
| 5   | 5   | - | - | K13823 1 3: | GO:004274 GO:000460 GO:0031838/haptoglobin-hemoglobin complex;GO:0005833/hemoglobin complex                                                                          |
| 19  | 18  | * | - | K10758 1 0: | GO:004545 GO:000905 GO:0005615/extracellular space;GO:0030173/integral to Golgi membrane                                                                             |
| 9   | 9   | * | - | K13023 1 0: | GO:005082 GO:003023 GO:0005576/extracellular region                                                                                                                  |
| -   | -   | - | - | K05726 1 1: | GO:004801 GO:000487 GO:0005925/focal adhesion;GO:0030027/lamellipodium;GO:0005829/cytosol;GO:0001726/ruffle                                                          |
| -   | -   | - | - | K06554 1 6- | -                                                                                                                                                                    |
| 1   | 1   | - | - | K01396 1 3: | GO:000687 GO:000551 GO:0005615/extracellular space                                                                                                                   |
| 2   | 2   | - | - | K06856 1 5- | -                                                                                                                                                                    |
| -   | -   | - | - | -           | GO:0016020/membrane                                                                                                                                                  |
| 1   | 1   | - | - | K07374 1 0: | GO:000022 GO:000551 GO:0005881/cytoplasmic microtubule;GO:0005576/extracellular region;GO:0005829/cytosol                                                            |
| -   | -   | - | - | K06856 1 1- | -                                                                                                                                                                    |
| 11  | 11  | - | - | K01435 1 0: | GO:000741 GO:000407 GO:0005730/nucleolus;GO:0005615/extracellular space;GO:0045177/apical part of cell;GO:0043204/perikaryon                                         |
| 19  | 19  | * | - | -           | GO:000695 - GO:0034364/high-density lipoprotein particle                                                                                                             |
| 2   | 2   | - | - | K03982 1 3: | GO:004587 GO:000820 GO:0031232/extrinsic to external side of plasma membrane;GO:0031594/neuromuscular junction;GO:0005829/cytosol;GO:0005615/ex                      |
| 14  | 13  | - | - | -           | GO:000150 GO:003029 GO:0005615/extracellular space;GO:0043234/protein complex;GO:0031012/extracellular matrix                                                        |
| 11  | 11  | * | - | K04525 1 1: | GO:001095 GO:000486 GO:0005615/extracellular space                                                                                                                   |
| 39  | 39  | - | - | K03995 1 0: | GO:001983 GO:000551 GO:0005615/extracellular space;GO:0005579/membrane attack complex                                                                                |
| -   | -   | - | - | K00142 1 0: | GO:000663 GO:000552 -                                                                                                                                                |
| 3   | 3   | * | - | K07374 1 0: | GO:005108 GO:001990 GO:0030496/midbody;GO:0005881/cytoplasmic microtubule                                                                                            |
| -   | -   | - | - | K11989 1 2: | GO:000205 GO:000511 GO:0005615/extracellular space;GO:0005886/plasma membrane;GO:0031012/extracellular matrix                                                        |
| -   | -   | - | - | K01314 1 0: | GO:000759 GO:000550 GO:0005815/microtubule organizing center;GO:0005796/Golgi lumen;GO:0031233/intrinsic to external side of plasma membrane;GO:0                    |
| 20  | 21  | * | - | K03910 1 0: | GO:003016 GO:001996 GO:0031093/platelet alpha granule lumen;GO:0005615/extracellular space;GO:0005829/cytosol                                                        |
| 2   | 2   | - | - | K12385 1 9- | - GO:000367 GO:0015630/microtubule cytoskeleton;GO:0016020/membrane;GO:0005615/extracellular space;GO:0005793/endoplasmic reticulum-C                                |
| 3   | 3   | - | - | -           | GO:000152 GO:000584 GO:0005615/extracellular space;GO:0005886/plasma membrane;GO:0005578/proteinaceous extracellular matrix                                          |
| 10  | 10  | * | - | K04004 1 6: | GO:004508 - GO:0005615/extracellular space                                                                                                                           |
| 55  | 55  | * | - | K04861 1 3: | GO:003021 GO:000486 GO:0005576/extracellular region                                                                                                                  |
| 5   | 5   | * | - | K03899 1 0: | GO:003016 GO:000550 GO:0005615/extracellular space;GO:0031093/platelet alpha granule lumen;GO:0005886/plasma membrane                                                |
| 10  | 10  | * | - | K03989 1 9: | GO:004508 - GO:0005576/extracellular region;GO:0005886/plasma membrane                                                                                               |
| 1   | 1   | - | - | K05906 1 0: | GO:003032 GO:000855 GO:0005764/lysosome;GO:0034361/very-low-density lipoprotein particle;GO:0005886/plasma membrane                                                  |
| 32  | 32  | * | - | K14480 1 0: | GO:001983 GO:000828 GO:0031224/intrinsic to membrane;GO:0034364/high-density lipoprotein particle;GO:0034361/very-low-density lipoprotein particle                   |
| 4   | 4   | * | - | K07964 1 0: | GO:003369 GO:000456 GO:0045121/membrane raft;GO:0005765/lysosomal membrane;GO:0005576/extracellular region;GO:0043202/lysosomal lumen;GO:0                           |
| -   | -   | - | - | K06554 1 2- | -                                                                                                                                                                    |
| 2   | 2   | - | - | K06819 1 0: | GO:000741 GO:001983 GO:0016021/integral to membrane;GO:0005576/extracellular region;GO:0030424/axon;GO:0002116/semaphorin receptor complex;G                         |
| 16  | 16  | * | - | K04550 1 0: | GO:004295 GO:000504 GO:0005905/coated pit;GO:0030425/dendrite;GO:0043025/neuronal cell body;GO:0005768/endosome;GO:0048471/perinuclear regio                         |
| 1   | 1   | - | - | K05546 1 0: | GO:001827 GO:003391 GO:0042470/melanosome;GO:0005788/endoplasmic reticulum lumen;GO:0017177/glucosidase II complex;GO:0005794/Golgi apparat                          |
| -   | -   | - | - | K06856 1 1- | -                                                                                                                                                                    |
| 30  | 30  | - | - | K05717 1 0: | GO:000152 GO:001650 GO:0005604/basement membrane;GO:0005793/endoplasmic reticulum-Golgi intermediate compartment;GO:0031093/platelet alpha gra                       |
| -   | -   | - | - | K06553 1 9- | -                                                                                                                                                                    |
| 1   | 1   | - | - | K00939 1 2: | GO:000705 GO:000401 GO:0005737/cytoplasm;GO:0005886/plasma membrane                                                                                                  |
| 16  | 16  | - | - | K08122 1 0: | GO:007084 GO:000520 GO:0005615/extracellular space;GO:0005796/Golgi lumen;GO:0043202/lysosomal lumen;GO:0005583/fibrillar collagen                                   |
| 12  | 12  | - | - | K00933 1 0: | GO:000660 GO:000411 GO:0005829/cytosol                                                                                                                               |
| 1   | 1   | - | - | K06856 1 8- | -                                                                                                                                                                    |
| 7   | 7   | - | - | K06856 1 8: | GO:000695 GO:000382 GO:0005576/extracellular region;GO:0016021/integral to membrane;GO:0005886/plasma membrane                                                       |
| 2   | 2   | - | - | K04004 1 0: | GO:000695 - GO:0005615/extracellular space                                                                                                                           |
| 2   | 2   | - | - | K10138 1 2: | GO:004356 GO:003199 GO:0042567/insulin-like growth factor ternary complex;GO:0042568/insulin-like growth factor binary complex;GO:0005634/nucleus                    |
| 33  | 33  | * | - | K03912 1 0: | GO:000693 GO:000486 GO:0005576/extracellular region                                                                                                                  |
| 6   | 6   | * | - | K13050 1 0: | GO:004308 GO:003419 GO:0005615/extracellular space;GO:0005764/lysosome;GO:0005794/Golgi apparatus;GO:0005770/late endosome;GO:0005769/early                          |
| 56  | 56  | - | - | K03913 1 0: | GO:001095 GO:000197 GO:0097183/protein C inhibitor-coagulation factor XI complex;GO:0036030/protein C inhibitor-plasma kallikrein complex;GO:0036024                 |
| 1   | 1   | - | - | -           | GO:001678 GO:0005576/extracellular region                                                                                                                            |
| 2   | 2   | - | - | K01899 1 4: | GO:000610 GO:000387 GO:0045244/succinate-CoA ligase complex (GDP-forming);GO:0005743/mitochondrial inner membrane;GO:0005886/plasma membrar                          |
| 2   | 2   | - | - | -           | GO:004547 GO:000550 GO:0005796/Golgi lumen;GO:0032059/bleb;GO:0005770/late endosome;GO:0005886/plasma membrane                                                       |
| -   | -   | - | - | K01321 1 0: | GO:000759 GO:000550 GO:0005796/Golgi lumen;GO:0005788/endoplasmic reticulum lumen;GO:0005576/extracellular region;GO:0005886/plasma membran                          |
| 1   | 1   | - | - | K13023 1 3: | GO:000715 GO:000802 GO:0005730/nucleolus;GO:0042567/insulin-like growth factor ternary complex                                                                       |
| 18  | 18  | * | - | -           | GO:004306 GO:000486 GO:0005886/plasma membrane;GO:0031093/platelet alpha granule lumen;GO:0005576/extracellular region                                               |
| 10  | 10  | * | - | K09487 1 0: | GO:003043 GO:004679 GO:0005788/endoplasmic reticulum lumen;GO:0042470/melanosome;GO:0005789/endoplasmic reticulum membrane;GO:0005829/cyt                            |
| 1   | 1   | - | - | K13980 1 0: | GO:004257 GO:005128 GO:0005829/cytosol;GO:0015630/microtubule cytoskeleton                                                                                           |
| 4   | 4   | - | - | K06554 1 9- | -                                                                                                                                                                    |
| 47  | 47  | - | - | K06856 1 4- | -                                                                                                                                                                    |
| 9   | 10  | - | - | K03998 1 0: | GO:000695 - GO:0005615/extracellular space;GO:0005579/membrane attack complex                                                                                        |
| 34  | 34  | * | - | K05768 1 0: | GO:005159 GO:000550 GO:0030027/lamellipodium;GO:0015629/actin cytoskeleton;GO:0005615/extracellular space;GO:0005829/cytosol;GO:0001726/ruffl                        |
| 4   | 5   | * | - | K10104 1 0: | GO:000822 GO:000382 GO:0005615/extracellular space;GO:0005581/collagen                                                                                               |
| 5   | 5   | * | - | K06840 1 0: | GO:004884 GO:000487 GO:0005615/extracellular space;GO:0016020/membrane                                                                                               |
| 1   | 1   | - | - | K04079 1 0: | GO:000741 GO:003091 GO:0042470/melanosome;GO:0005829/cytosol;GO:0005886/plasma membrane                                                                              |
| 42  | 42  | - | - | K03917 1 0: | GO:001814 GO:004687 GO:0031093/platelet alpha granule lumen;GO:0005576/extracellular region                                                                          |
| 6   | 5   | * | - | K10066 1 2: | GO:000727 GO:000553 GO:0005581/collagen                                                                                                                              |
| 54  | 55  | * | - | K01315 1 0: | GO:003016 GO:003418 GO:0031232/extrinsic to external side of plasma membrane;GO:0005615/extracellular space;GO:0031093/platelet alpha granule lumen                  |
| 21  | 21  | * | - | K08761 1 0: | GO:001018 GO:000828 GO:0005576/extracellular region                                                                                                                  |
| 6   | 6   | * | - | K06554 1 4- | -                                                                                                                                                                    |
| 4   | 4   | - | - | K06554 1 3: | GO:004508 GO:000382 GO:0005886/plasma membrane;GO:0005576/extracellular region                                                                                       |
| 27  | 28  | * | - | K03910 1 0: | GO:003016 GO:001996 GO:0031093/platelet alpha granule lumen;GO:0005615/extracellular space;GO:0005829/cytosol                                                        |
| 5   | 5   | - | - | K06554 1 4- | -                                                                                                                                                                    |
| -   | -   | - | - | -           | GO:003291 GO:000487 GO:0009897/external side of plasma membrane;GO:0016021/integral to membrane                                                                      |
| 1   | 1   | - | - | K05465 1 0: | GO:003313 GO:003097 GO:0005615/extracellular space;GO:0045121/membrane raft;GO:0005886/plasma membrane;GO:0005902/microvillus                                        |
| 1   | 1   | - | - | K06255 1 0: | GO:000602 GO:000802 GO:0005796/Golgi lumen;GO:0005604/basement membrane;GO:0043202/lysosomal lumen;GO:0005615/extracellular space;GO:0005                            |
| 239 | 239 | - | - | K01883 1 7: | GO:004668 GO:005108 GO:0005604/basement membrane;GO:0005814/centriole;GO:0031093/platelet alpha granule lumen;GO:0043296/apical junction comp                        |

|     |     |   |   |                                                                                                                                                                    |   |
|-----|-----|---|---|--------------------------------------------------------------------------------------------------------------------------------------------------------------------|---|
| 8   | 8   | - | - | K068561 1 -                                                                                                                                                        | - |
| 10  | 10  | * | * | K01344 1 0. GO:001718 GO:000550 GO:0005796//Golgi lumen;GO:0005615//extracellular space;GO:0005788//endoplasmic reticulum lumen;GO:0005886//plasma membrane        |   |
| 10  | 10  | * | * | K08758 1 2. GO:0006069 GO:004280 GO:004262//chylomicron;GO:0005788//endoplasmic reticulum lumen;GO:0034361//very-low-density lipoprotein particle;GO:0034366//     |   |
| 3   | 3   | - | - | K09490 1 0. GO:003051 GO:005108 GO:0009986//cell surface;GO:0034663//endoplasmic reticulum chaperone complex;GO:0030496//midbody;GO:0005788//endoplasmic ret       |   |
| 11  | 11  | - | * | K09821 1 0. GO:004816 GO:000808 GO:0005615//extracellular space;GO:004444//cytoplasmic part                                                                        |   |
| 1   | 1   | - | - | K068561 1 -                                                                                                                                                        | - |
| 4   | 4   | - | - | K01324 1 0. GO:000759 GO:001670 GO:0005615//extracellular space;GO:0005886//plasma membrane                                                                        |   |
| 21  | 21  | - | - | K05316 1 4. GO:003021 GO:000486 GO:0005576//extracellular region                                                                                                   |   |
| 4   | 4   | * | - | K13912 1 2- GO:000550 GO:0005635//nuclear envelope                                                                                                                 |   |
| 1   | 1   | - | - | K00778 1 0. GO:001827 GO:000383 GO:0032580//Golgi cisterna membrane;GO:0030173//integral to Golgi membrane;GO:0005576//extracellular region                        |   |
| -   | -   | - | - | K03544 1 5. GO:000645 GO:004687 GO:0005730//nucleolus;GO:0005743//mitochondrial inner membrane;GO:0042645//mitochondrial nucleoid;GO:0009841//mitochondrial e      |   |
| 1   | 1   | - | - | K04525 1 2. GO:003469 GO:000486 GO:0005615//extracellular space                                                                                                    |   |
| 1   | 1   | - | - | K06630 1 6. GO:003016 GO:001630 GO:0005654//nucleoplasm;GO:0042470//melanosome;GO:0005829//cytosol;GO:0031252//cell leading edge;GO:0043234//protein compl         |   |
| 1   | 1   | - | - | K05464 1 5. GO:000991 GO:000549 GO:0005576//extracellular region                                                                                                   |   |
| -   | -   | - | - | K03902 1 3. GO:003016 GO:000550 GO:0005615//extracellular space;GO:0031093//platelet alpha granule lumen;GO:0005886//plasma membrane                               |   |
| 1   | 1   | - | - | - GO:003362 GO:000517 GO:0002102//podosome;GO:0030054//cell junction;GO:0042995//cell projection                                                                   |   |
| -   | -   | - | - | K01279 1 0. GO:004236 GO:000843 GO:0005829//cytosol;GO:0005654//nucleoplasm;GO:0000783//nuclear telomere cap complex;GO:0043202//lysosomal lumen;GO:000572         |   |
| 1   | 1   | - | - | K068561 3 -                                                                                                                                                        | - |
| -   | -   | - | - | K01230 1 0. GO:001827 GO:000457 GO:0000139//Golgi membrane;GO:0005793//endoplasmic reticulum-Golgi intermediate compartment;GO:0016021//integral to membrane       |   |
| -   | -   | - | - | K13618 1 0. GO:000665 GO:000897 GO:0005576//extracellular region                                                                                                   |   |
| 519 | 519 | * | - | K14462 1 0. GO:001088 GO:005075 GO:0030669//clathrin-coated endocytic vesicle membrane;GO:0034360//chylomicron remnant;GO:0005788//endoplasmic reticulum lumen     |   |
| -   | -   | - | - | K14462 1 4. GO:001088 GO:005075 GO:0030669//clathrin-coated endocytic vesicle membrane;GO:0034360//chylomicron remnant;GO:0005788//endoplasmic reticulum lumen     |   |
| 1   | 1   | - | - | K068561 3 -                                                                                                                                                        | - |
| 12  | 12  | - | * | K03898 1 0. GO:003016 GO:000510 GO:0031093//platelet alpha granule lumen;GO:0005615//extracellular space;GO:0005886//plasma membrane                               |   |
| 35  | 35  | - | * | K13912 1 2. GO:000696 GO:000504 GO:0016020//membrane;GO:0005615//extracellular space;GO:0005578//proteinaceous extracellular matrix                                |   |
| 3   | 3   | * | - | K06554 1 1-                                                                                                                                                        | - |
| 5   | 5   | * | * | - GO:000646 GO:000486 GO:0043234//protein complex;GO:0005576//extracellular region                                                                                 |   |
| 22  | 22  | * | * | K05692 1 0. GO:000741 GO:001990 GO:0030863//cortical cytoskeleton;GO:0031941//filamentous actin;GO:0005829//cytosol;GO:0030016//myofibril;GO:0030424//axon;GC      |   |
| 2   | 2   | - | * | K03986 1 3. GO:004508 GO:000551 GO:0005602//complement component C1 complex;GO:0005581//collagen                                                                   |   |
| 1   | 1   | - | - | - GO:000550 GO:0005578//proteinaceous extracellular matrix                                                                                                         |   |
| 1   | 1   | - | - | - GO:0005730//nucleolus;GO:0005929//cilium;GO:0005874//microtubule                                                                                                 |   |
| 8   | 8   | * | - | K08136 1 2. GO:000716 GO:000550 GO:0005615//extracellular space;GO:0005578//proteinaceous extracellular matrix                                                     |   |
| -   | -   | - | - | K09582 1 0. GO:004545 GO:000905 GO:0005788//endoplasmic reticulum lumen;GO:0042470//melanosome                                                                     |   |
| -   | -   | - | - | K068561 3 -                                                                                                                                                        | - |
| 10  | 10  | - | - | K01197 1 0. GO:000961 GO:000441 GO:0005615//extracellular space;GO:0031410//cytoplasmic vesicle;GO:0043202//lysosomal lumen;GO:0036117//hyaluronan cable           |   |
| -   | -   | - | - | K068561 3 -                                                                                                                                                        | - |
| 7   | 7   | - | * | K05407 1 6. GO:001652 GO:000820 GO:0031093//platelet alpha granule lumen;GO:0005615//extracellular space                                                           |   |
| 45  | 45  | * | - | K07127 1 1- GO:000551 GO:0005576//extracellular region                                                                                                             |   |
| 15  | 14  | * | * | - GO:000662 GO:000531 GO:0034364//high-density lipoprotein particle;GO:0034361//very-low-density lipoprotein particle                                              |   |
| -   | -   | - | - | K10788 1 0. GO:004274 GO:004687 -                                                                                                                                  |   |
| -   | -   | - | - | K06554 1 2- -                                                                                                                                                      |   |
| 3   | 3   | - | - | K01328 1 0. GO:000759 GO:005178 GO:0005615//extracellular space;GO:0005886//plasma membrane                                                                        |   |
| 1   | 1   | - | - | K11254 1 2. GO:000633 GO:000367 GO:0000786//nucleosome;GO:0005634//nucleus                                                                                         |   |
| 12  | 11  | * | * | K03904 1 0. GO:003016 GO:003067 GO:0009897//external side of plasma membrane;GO:0031093//platelet alpha granule lumen;GO:0005938//cell cortex;GO:0005577//fibrin   |   |
| 138 | 138 | - | - | K04524 1 5. GO:000664 GO:005075 GO:0031232//extrinsic to external side of plasma membrane;GO:0034364//high-density lipoprotein particle;GO:0042627//chylomicron;GC |   |
| -   | -   | - | - | K06251 1 6. GO:003209 GO:000517 GO:0005615//extracellular space;GO:0071062//alphav-beta3 integrin-vitronectin complex;GO:0031012//extracellular matrix             |   |
| 8   | 8   | - | * | K04004 1 0. GO:000695 - GO:0005615//extracellular space                                                                                                            |   |
| -   | -   | - | - | K05857 1 4. GO:001604 GO:000487 GO:0031965//nuclear membrane;GO:0005829//cytosol                                                                                   |   |
| 1   | 1   | - | - | K00873 1 0. GO:001631 GO:000474 GO:0005886//plasma membrane;GO:0005634//nucleus;GO:0005829//cytosol;GO:0005739//mitochondrion                                      |   |
| -   | -   | - | - | K08569 1 2. GO:000695 GO:000823 -                                                                                                                                  |   |
| 3   | 3   | - | - | K068561 2- -                                                                                                                                                       |   |
| 24  | 24  | - | - | K13912 1 4. GO:000696 GO:000504 GO:0016020//membrane;GO:0005615//extracellular space                                                                               |   |
| -   | -   | - | - | K068561 3 -                                                                                                                                                        | - |
| 1   | 1   | - | - | K04659 1 0. GO:006017 GO:000820 GO:0005615//extracellular space;GO:0005578//proteinaceous extracellular matrix                                                     |   |
| 43  | 43  | - | * | K03987 1 8. GO:000695 GO:000551 GO:0005576//extracellular region                                                                                                   |   |
| -   | -   | - | - | K09290 1 1. GO:003004 - GO:0005829//cytosol;GO:0030863//cortical cytoskeleton;GO:0002102//podosome;GO:0001725//stress fiber;GO:0005862//muscle thin fil            |   |
| 4   | 4   | - | - | - GO:004632 GO:000510 GO:0031526//brush border membrane;GO:0045121//membrane raft;GO:0005576//extracellular region;GO:0031225//anchored to membra                  |   |
| 7   | 7   | * | * | K14462 1 0. GO:001088 GO:005075 GO:0030669//clathrin-coated endocytic vesicle membrane;GO:0034360//chylomicron remnant;GO:0005788//endoplasmic reticulum lumen     |   |
| 1   | 1   | - | - | K06849 1 1. GO:003338 GO:000551 GO:0000139//Golgi membrane;GO:0031093//platelet alpha granule lumen;GO:0005615//extracellular space;GO:0042588//zymogen gran       |   |
| 4   | 5   | - | - | K01300 1 0. GO:004249 GO:000418 GO:0005615//extracellular space                                                                                                    |   |
| 1   | 1   | - | - | K13822 1 2. GO:004274 GO:000460 GO:0022627//cytosolic small ribosomal subunit;GO:0031838//haptoglobin-hemoglobin complex;GO:0005833//hemoglobin complex            |   |
| -   | -   | - | - | K06553 1 2- -                                                                                                                                                      |   |
| 4   | 4   | * | * | K03992 1 0. GO:000650 GO:000550 GO:0005615//extracellular space                                                                                                    |   |
| -   | -   | - | - | K08120 1 0. GO:007017 GO:001528 GO:0046930//pore complex;GO:0005578//proteinaceous extracellular matrix                                                            |   |
| 3   | 3   | * | - | - GO:007127 GO:000551 GO:0031045//dense core granule;GO:0043196//varicosity;GO:0043679//axon terminus;GO:0005615//extracellular space;GO:0005794//G                |   |
| 5   | 5   | - | - | K06512 1 7- - GO:0005576//extracellular region                                                                                                                     |   |
| -   | -   | - | - | K13279 1 8. GO:000150 GO:000837 GO:0042470//melanosome;GO:0005634//nucleus;GO:0005739//mitochondrion                                                               |   |
| 9   | 9   | - | * | K10029 1 2. GO:003016 GO:000535 GO:0005615//extracellular space;GO:0031093//platelet alpha granule lumen                                                           |   |

supplementary table3. A list of dysregulated proteins between group A(EH) and group B(TJT)

| Hits | Accession                | Desription                                                             | Mass   | Seq      | Score | Cov    | SameSets | Spectrum | Unique Spe | Peptide | Unique Pep |
|------|--------------------------|------------------------------------------------------------------------|--------|----------|-------|--------|----------|----------|------------|---------|------------|
| 1    | spP35908 K22E_HUMAN      | Keratin, type II cytoskeletal 2 epidermal OS=Homo sapiens GN=KRT7      | 76630  | MSCQISC  | 275   | 15.5 - |          | 23       | 13         | 10      | 8          |
| 2    | tr B4E0A4 B4E0A4_HUMAN   | cDNA FLJ57023, highly similar to Homo sapiens collagen, type VI, al    | 149266 | MRKHRHL  | 124   | 4.3    | 4        | 12       | 12         | 5       | 5          |
| 3    | sp P18428 LBP_HUMAN      | Lipoplysaccharide-binding protein OS=Homo sapiens GN=LBP PE=           | 60518  | MGALARL  | 2335  | 20.2 - |          | 145      | 145        | 9       | 9          |
| 4    | tr L8E853 L8E853_HUMAN   | von Willebrand factor OS=Homo sapiens GN=VWF PE=4 SV=1                 | 341812 | MIPARFA  | 627   | 7.5 -  |          | 65       | 65         | 19      | 19         |
| 5    | sp P00739 HPTTR_HUMAN    | Haptoglobin-related protein OS=Homo sapiens GN=HPR PE=1 SV=2           | 48340  | MSDLGAV  | 677   | 36.2 - |          | 72       | 22         | 11      | 4          |
| 6    | sp P19652 A1AG2_HUMAN    | Alpha-1-acid glycoprotein 2 OS=Homo sapiens GN=ORM2 PE=1 SV            | 28132  | MALSWVI  | 61    | 9.5 -  |          | 7        | 7          | 2       | 2          |
| 7    | tr K7ER19 K7ER19_HUMAN   | Truncated apolipoprotein C-I (Fragment) OS=Homo sapiens GN=APC         | 11075  | MRLFLSLI | 409   | 32.5   | 1        | 51       | 51         | 3       | 3          |
| 8    | tr Q5SRP5 Q5SRP5_HUMAN   | Apolipoprotein M OS=Homo sapiens GN=APOM PE=1 SV=1                     | 17751  | MAAGSAF  | 61    | 17.8   | 1        | 11       | 11         | 3       | 3          |
| 9    | sp P35527 K1C9_HUMAN     | Keratin, type I cytoskeletal 9 OS=Homo sapiens GN=KRT9 PE=1 SV:        | 70468  | MSCRFQS  | 62    | 10.4 - |          | 7        | 7          | 5       | 5          |
| 10   | tr F1C4A7 F1C4A7_HUMAN   | Monocyte differentiation antigen CD14 OS=Homo sapiens GN=CD14          | 185    | 19.2     |       | 2      | 18       | 18       | 6          | 6       | 6          |
| 11   | sp P13645 K1C10_HUMAN    | Keratin, type I cytoskeletal 10 OS=Homo sapiens GN=KRT10 PE=1 S        | 66321  | MSVRYSS  | 504   | 13.5 - |          | 23       | 22         | 7       | 6          |
| 12   | sp P0C0L4 C04A_HUMAN     | Complement C4-A OS=Homo sapiens GN=C4A PE=1 SV=2                       | 217989 | MRLWLGI  | 18599 | 42 -   |          | 1660     | 16         | 65      | 2          |
| 13   | tr Q5J875 Q5J875_HUMAN   | GUGU gamma form OS=Homo sapiens GN=GUGU PE=2 SV=1                      | 41888  | MGLFLPL  | 47    | 8.5    | 3        | 7        | 7          | 3       | 3          |
| 14   | sp P0C0L5 C04B_HUMAN     | Complement C4-B OS=Homo sapiens GN=C4B PE=1 SV=2                       | 217898 | MRLWLGI  | 19149 | 42 -   |          | 1692     | 38         | 65      | 2          |
| 15   | sp O00391 QSOX1_HUMAN    | Sulfhydryl oxidase 1 OS=Homo sapiens GN=QSOX1 PE=1 SV=3                | 93667  | MRRNCSC  | 373   | 21.3 - |          | 61       | 61         | 16      | 16         |
| 16   | tr A8K6C1 A8K6C1_HUMAN   | cDNA FLJ76868, highly similar to Homo sapiens cholesterol ester tra    | 63358  | MLAATVL  | 447   | 10.8   | 1        | 41       | 41         | 6       | 6          |
| 17   | tr D6REX5 D6REX5_HUMAN   | Selenoprotein P (Fragment) OS=Homo sapiens GN=SEPP1 PE=4 SV:           | 42698  | MWRSLGI  | 165   | 12.6   | 1        | 9        | 9          | 4       | 4          |
| 18   | tr A0A096LPE2 A0A096LPE2 | Protein SAA2-SAA4 OS=Homo sapiens GN=SAA2-SAA4 PE=4 SV:                | 26856  | MKLLTGL  | 304   | 21.2 - |          | 60       | 59         | 4       | 3          |
| 19   | tr B2R815 B2R815_HUMAN   | cDNA, FLJ93695, highly similar to Homo sapiens serpin peptidase in     | 57184  | MHLIDYLI | 167   | 17.1   | 1        | 25       | 25         | 7       | 7          |
| 20   | tr Q6U2L6 Q6U2L6_HUMAN   | C4B (Fragment) OS=Homo sapiens GN=C4B PE=4 SV=1                        | 11768  | RSMQGGH  | 306   | 15 -   |          | 53       | 52         | 4       | 3          |
| 21   | tr A0A024R1G8 A0A024R1G8 | Apolipoprotein L1, isoform CRA_b OS=Homo sapiens GN=APOL1              | 54476  | MRFKSGT  | 561   | 20     | 11       | 63       | 63         | 9       | 9          |
| 22   | tr H6VRF8 H6VRF8_HUMAN   | Keratin 1 OS=Homo sapiens GN=KRT1 PE=3 SV=1                            | 75006  | MSRQFTS  | 670   | 24.8   | 4        | 46       | 36         | 13      | 11         |
| 23   | sp P05546 HEP2_HUMAN     | Heparin cofactor 2 OS=Homo sapiens GN=SERPIND1 PE=1 SV=3               | 67548  | MKHSLLA  | 699   | 28.1 - |          | 115      | 115        | 16      | 16         |
| 24   | tr A0A0A0MS51 A0A0A0MS51 | Gelsolin OS=Homo sapiens GN=GSN PE=4 SV=1                              | 96753  | MAEEELA  | 655   | 18.4   | 6        | 64       | 64         | 12      | 12         |
| 25   | tr C9JPG5 C9JPG5_HUMAN   | Semaphorin-3F OS=Homo sapiens GN=SEMA3F PE=4 SV=1                      | 86066  | MYVGSKI  | 40    | 0.9    | 2        | 5        | 5          | 1       | 1          |
| 26   | sp Q96PD5 PGRP2_HUMAN    | N-acetylmuramoyl-L-alanine amidase OS=Homo sapiens GN=PGLYR            | 66703  | MAQGVLV  | 186   | 8.7 -  |          | 13       | 13         | 4       | 4          |
| 27   | tr Q1HP67 Q1HP67_HUMAN   | Lipoprotein, Lp(A) OS=Homo sapiens GN=LPA PE=1 SV=1                    | 240494 | MEHKEVV  | 211   | 6.1    | 1        | 17       | 17         | 10      | 10         |
| 28   | tr B3KUE5 B3KUE5_HUMAN   | Phospholipid transfer protein, isoform CRA_c OS=Homo sapiens GN        | 62359  | MGLSGSD  | 390   | 18.3   | 2        | 33       | 33         | 9       | 9          |
| 29   | sp P40197 GPV_HUMAN      | Platelet glycoprotein V OS=Homo sapiens GN=GP5 PE=1 SV=1               | 65693  | MLRGTLT  | 67    | 13.2 - |          | 10       | 10         | 6       | 6          |
| 30   | sp P08697 A2AP_HUMAN     | Alpha-2-antiplasmin OS=Homo sapiens GN=SERPINF2 PE=1 SV=3              | 60957  | MALLWGI  | 421   | 17.7 - |          | 62       | 62         | 8       | 8          |
| 31   | tr V9GYG9 V9GYG9_HUMAN   | Apolipoprotein A-II (Fragment) OS=Homo sapiens GN=APOA2 PE=            | 14103  | MKLLAAT  | 186   | 38.9   | 2        | 60       | 60         | 3       | 3          |
| 32   | tr B2R5S1 B2R5S1_HUMAN   | cDNA, FLJ92595, highly similar to Homo sapiens angiotensinogen (se     | 60156  | MRKRAPC  | 350   | 9.5    | 6        | 15       | 15         | 4       | 4          |
| 33   | sp P02763 A1AG1_HUMAN    | Alpha-1-acid glycoprotein 1 OS=Homo sapiens GN=ORM1 PE=1 SV            | 28288  | MALSWVI  | 54    | 7.5 -  |          | 5        | 5          | 1       | 1          |
| 34   | tr C0JY22 C0JY22_HUMAN   | Apolipoprotein B (Including Ag(X) antigen) OS=Homo sapiens GN=A        | 625263 | MDPPRPA  | 22843 | 45.3 - |          | 2373     | 1080       | 198     | 94         |
| 35   | tr D3DNU8 D3DNU8_HUMAN   | Kininogen 1, isoform CRA_a OS=Homo sapiens GN=KNG1 PE=4 SV             | 59249  | MKLTITLF | 208   | 25.1   | 3        | 31       | 31         | 10      | 10         |
| 36   | sp Q92954 PRG4_HUMAN     | Proteoglycan 4 OS=Homo sapiens GN=PRG4 PE=1 SV=2 >tr A0A02             | 202736 | MAWKTLI  | 94    | 4.5 -  |          | 12       | 12         | 7       | 7          |
| 37   | sp P55056 APOC4_HUMAN    | Apolipoprotein C-IV OS=Homo sapiens GN=APOC4 PE=1 SV=1                 | 17623  | MSLLRNR  | 288   | 20.5 - |          | 35       | 35         | 3       | 3          |
| 38   | tr Q9YHB3 Q9YHB3_HUMAN   | Apolipoprotein B variant (Fragment) OS=Homo sapiens PE=2 SV=1          | 222441 | TIEGPLTS | 7264  | 45 -   |          | 713      | 7          | 67      | 1          |
| 39   | tr J3KP79 J3KP79_HUMAN   | Anthrax toxin receptor 2 OS=Homo sapiens GN=ANTXR2 PE=1 SV:            | 54148  | MRLSFVF  | 65    | 16.3   | 1        | 8        | 7          | 6       | 5          |
| 1    | sp P05164 PERM_HUMAN     | Lactoperoxidase OS=Homo sapiens GN=MPO PE=1 SV=1                       | 91781  | MGVPPFS  | 129   | 8.5 -  |          | 15       | 8          | 6       | 4          |
| 2    | tr Q9UMV1 Q9UMV1_HUMA    | Complement C4B1a (Fragment) OS=Homo sapiens GN=C4B PE=4 S              | 5960   | AAIESPGV | 102   | 23.9   | 1        | 14       | 14         | 1       | 1          |
| 3    | sp Q15485 FCN2_HUMAN     | Ficolin-2 OS=Homo sapiens GN=FCN2 PE=1 SV=2                            | 39607  | MELDRVA  | 308   | 14.7 - |          | 38       | 38         | 5       | 5          |
| 4    | tr Q6UXM4 Q6UXM4_HUMA    | Ficolin (Collagen/fibrinogen domain containing) 3 (Hakata antigen), is | 34547  | MDLLWIL  | 731   | 26.4   | 1        | 80       | 80         | 8       | 8          |
| 5    | tr E7EUT5 E7EUT5_HUMAN   | Glyceraldehyde-3-phosphate dehydrogenase OS=Homo sapiens GN=G          | 34412  | MEEMRDF  | 175   | 18.5   | 1        | 11       | 11         | 3       | 3          |
| 6    | tr F8VV32 F8VV32_HUMAN   | Lysozyme C OS=Homo sapiens GN=LYZ PE=1 SV=1                            | 13895  | MKALIVLA | 163   | 23.1   | 1        | 12       | 12         | 2       | 2          |
| 7    | tr Q5VY30 Q5VY30_HUMAN   | Retinol binding protein 4, plasma, isoform CRA_b OS=Homo sapiens       | 26952  | MNYSKIP  | 63    | 15.1   | 1        | 7        | 7          | 3       | 3          |
| 8    | tr E7EQB2 E7EQB2_HUMAN   | Lactotransferrin (Fragment) OS=Homo sapiens GN=LTF PE=1 SV=1           | 92148  | MGLCLAC  | 602   | 30.2   | 2        | 52       | 52         | 18      | 18         |
| 9    | sp Q02985 FHR3_HUMAN     | Complement factor H-related protein 3 OS=Homo sapiens GN=CFHR          | 44580  | MLLLINVI | 81    | 14.5 - |          | 11       | 10         | 5       | 4          |
| 10   | tr B3KPS3 B3KPS3_HUMAN   | cDNA FLJ32131 fis, clone PEBLM2000267, highly similar to Tubulir       | 100    | 15.4     |       | 8      | 7        | 3        | 4          | 2       | 2          |
| 11   | tr B2R6W1 B2R6W1_HUMAN   | cDNA, FLJ93143, highly similar to Homo sapiens complement compo        | 111585 | MKVISLFI | 635   | 25.9 - |          | 91       | 4          | 19      | 2          |
| 12   | sp Q03591 FHR1_HUMAN     | Complement factor H-related protein 1 OS=Homo sapiens GN=CFHR          | 43938  | MWLLVSV  | 957   | 33 -   |          | 97       | 20         | 10      | 2          |
| 13   | tr B0YIW1 B0YIW1_HUMAN   | Apolipoprotein A-V variant 3 OS=Homo sapiens GN=APOA5 PE=2 S           | 45822  | MAAVLTV  | 228   | 19.8   | 2        | 22       | 22         | 7       | 7          |
| 14   | tr A0A024RDB8 A0A024RDB8 | Heparanase, isoform CRA_a OS=Homo sapiens GN=HPSE PE=4 SV:             | 73287  | MLLRSKP  | 105   | 6.6    | 2        | 14       | 14         | 4       | 4          |
| 15   | sp Q07954 LRP1_HUMAN     | Prolow-density lipoprotein receptor-related protein 1 OS=Homo sapier   | 576082 | MLTPPLLI | 243   | 3.5 -  |          | 29       | 29         | 14      | 14         |
| 16   | tr B2R812 B2R812_HUMAN   | cDNA, FLJ93914, highly similar to Homo sapiens histidine-rich glyco    | 67498  | MKALIAA  | 211   | 22.1   | 1        | 29       | 29         | 11      | 11         |
| 17   | sp O00602 FCN1_HUMAN     | Ficolin-1 OS=Homo sapiens GN=FCN1 PE=1 SV=2                            | 42205  | MELSGAT  | 99    | 8.9 -  |          | 9        | 9          | 3       | 3          |
| 18   | tr A0A075B6R9 A0A075B6R9 | Protein IGKV2D-24 (Fragment) OS=Homo sapiens GN=IGKV2D-24              | 14040  | MRLLAQL  | 160   | 16.7 - |          | 8        | 7          | 2       | 1          |
| 19   | tr D3DQX7 D3DQX7_HUMA    | Serum amyloid A protein OS=Homo sapiens GN=SAA1 PE=3 SV=1              | 15436  | MKLLTGL  | 105   | 20.5 - |          | 10       | 9          | 3       | 2          |
| 20   | sp P07357 CO8A_HUMAN     | Complement component C8 alpha chain OS=Homo sapiens GN=C8A             | 76870  | MFAVVVF  | 244   | 15.2 - |          | 28       | 28         | 8       | 8          |
| 21   | tr B2R6M6 B2R6M6_HUMAN   | cDNA, FLJ93024, highly similar to Homo sapiens EGF-containing fib      | 60522  | MLKALFL  | 224   | 9.7    | 6        | 22       | 22         | 4       | 4          |
| 22   | tr A0A5E4 A0A5E4_HUMAN   | Uncharacterized protein OS=Homo sapiens PE=2 SV=1                      | 28363  | MAWMMI   | 1459  | 35.3 - |          | 173      | 14         | 7       | 1          |
| 23   | sp Q13103 SPP24_HUMAN    | Secreted phosphoprotein 24 OS=Homo sapiens GN=SPP2 PE=1 SV=            | 27041  | MISRMKE  | 138   | 15.6 - |          | 14       | 14         | 3       | 3          |
| 24   | tr B4E335 B4E335_HUMAN   | cDNA FLJ52842, highly similar to Actin, cytoplasmic 1 OS=Homo sa       | 45627  | MDDDDIA  | 366   | 33.6   | 7        | 42       | 42         | 9       | 9          |
| 25   | tr X6RLJ0 X6RLJ0_HUMAN   | Complement C1q subcomponent subunit A (Fragment) OS=Homo sap           | 27065  | MEGPRGV  | 58    | 11.8   | 1        | 8        | 8          | 3       | 3          |
| 26   | tr B4DNS6 B4DNS6_HUMAN   | cDNA FLJ54278, highly similar to SPARC-like protein 1 OS=Homo s        | 71190  | MKTGLFF  | 116   | 9.6    | 4        | 13       | 13         | 4       | 4          |
| 27   | tr A0A087WT59 A0A087WT5  | Transthyretin OS=Homo sapiens GN=TTR PE=3 SV=1                         | 23099  | MASHRLI  | 813   | 21.1   | 4        | 56       | 56         | 5       | 5          |
| 28   | tr A0A024R962 A0A024R962 | HCG40889, isoform CRA_b OS=Homo sapiens GN=hCG_40889 PE:               | 168295 | MRLAKII  | 2249  | 30.5   | 1        | 277      | 12         | 33      | 2          |
| 29   | tr Q6MZL2 Q6MZL2_HUMAN   | Putative uncharacterized protein DKFZp686M0562 (Fragment) OS=H         | 38922  | NPGIYTS  | 103   | 12.8 - |          | 10       | 9          | 4       | 3          |
| 30   | tr D6RHH7 D6RHH7_HUMAN   | Corticotropin-releasing factor-binding protein OS=Homo sapiens GN=     | 30563  | MSPNFKL  | 48    | 8      | 1        | 4        | 4          | 2       | 2          |
| 31   | sp P48740 MASP1_HUMAN    | Mannan-binding lectin serine protease 1 OS=Homo sapiens GN=MAS         | 92409  | MRWLLLY  | 566   | 26 -   |          | 59       | 15         | 14      | 6          |

| A-VS-B@R | A-VS-B@R | A-VS-B@C | A-VS-B@C | A-VS-B@S | A-VS-B@S | A-VS-B@A | A-VS-B@S | KEGG(ko_i  | GO Biologi | GO Molecu  | GO Cellular_Component                                                                                                                                                          |
|----------|----------|----------|----------|----------|----------|----------|----------|------------|------------|------------|--------------------------------------------------------------------------------------------------------------------------------------------------------------------------------|
| 0.608    | 0.607    | 4        | 4        | *        | *        | 0.6075   | 0.000707 | K07605 1 0 | GO:003298  | GO:000520  | GO:0005794//Golgi apparatus;GO:0045095//keratin filament                                                                                                                       |
| 0.562    | 0.549    | 8        | 8        | -        | *        | 0.5555   | 0.009192 | K06238 1 0 | GO:000741  | GO:000486  | GO:0030133//transport vesicle;GO:0005615//extracellular space;GO:0005788//endoplasmic reticulum                                                                                |
| 0.794    | 0.784    | 106      | 106      | *        | -        | 0.789    | 0.007071 | K05399 1 0 | GO:003272  | GO:000510  | GO:0005615//extracellular space                                                                                                                                                |
| 0.813    | 0.665    | 31       | 31       | *        | -        | 0.739    | 0.104652 | K03900 1 0 | GO:003016  | GO:0004748 | GO:0009897//external side of plasma membrane;GO:0033093//Weibel-Palade body;GO:0005788//endoplasmic reticulum                                                                  |
| 0.676    | 0.704    | 18       | 18       | *        | *        | 0.69     | 0.019799 | K14477 1 0 | GO:000695  | GO:003049  | GO:0031838//haptoglobin-hemoglobin complex;GO:0034366//spherical high-density lipoprotein particle                                                                             |
| 0.897    | 0.763    | 3        | 3        | -        | *        | 0.83     | 0.094752 | -          | GO:000268  | GO:000551  | GO:0005615//extracellular space                                                                                                                                                |
| 0.739    | 0.71     | 14       | 14       | *        | -        | 0.7245   | 0.020506 | K04524 1 9 | GO:001087  | GO:003121  | GO:0042627//chylomicron;GO:0034361//very-low-density lipoprotein particle;GO:0034362//low-density lipoprotein particle;GO:0034365//discoidal high-density lipoprotein particle |
| 0.669    | 0.73     | 2        | 2        | -        | *        | 0.6995   | 0.043134 | -          | GO:003334  | GO:000554  | GO:0034362//low-density lipoprotein particle;GO:0034365//discoidal high-density lipoprotein particle                                                                           |
| 0.63     | 0.618    | 3        | 3        | *        | -        | 0.624    | 0.008485 | K07604 1 1 | GO:000728  | GO:000520  | GO:0045095//keratin filament;GO:0048471//perinuclear region of cytoplasm                                                                                                       |
| 0.594    | 0.483    | 11       | 11       | *        | *        | 0.5385   | 0.078489 | K04391 1 0 | GO:000690  | GO:007089  | GO:0045121//membrane raft;GO:0005615//extracellular space;GO:0031225//anchored protein                                                                                         |
| 0.468    | 0.442    | 14       | 14       | *        | *        | 0.455    | 0.018385 | K07604 1 0 | GO:007127  | GO:003028  | GO:0005737//cytoplasm;GO:0045095//keratin filament                                                                                                                             |
| 0.79     | 0.622    | 5        | 5        | *        | *        | 0.706    | 0.118794 | K03989 1 0 | GO:000695  | GO:000486  | GO:0005615//extracellular space;GO:0005886//plasma membrane                                                                                                                    |
| 0.264    | 0.215    | 3        | 3        | *        | *        | 0.2395   | 0.034648 | K03898 1 8 | -          | -          | GO:0005576//extracellular region                                                                                                                                               |
| 0.844    | 0.653    | 29       | 29       | -        | *        | 0.7485   | 0.135057 | K03989 1 0 | GO:000695  | GO:000486  | GO:0005615//extracellular space;GO:0005886//plasma membrane                                                                                                                    |
| 0.816    | 0.801    | 19       | 19       | *        | *        | 0.8085   | 0.010607 | K10758 1 0 | GO:004545  | GO:000905  | GO:0005615//extracellular space;GO:0030173//integral to Golgi membrane                                                                                                         |
| 0.721    | 0.829    | 17       | 17       | *        | *        | 0.775    | 0.076368 | K05399 1 1 | GO:004369  | GO:001712  | GO:0031982//vesicle;GO:0034364//high-density lipoprotein particle                                                                                                              |
| 0.731    | 0.894    | 5        | 4        | *        | *        | 0.8125   | 0.115258 | -          | GO:001026  | GO:000843  | GO:0005615//extracellular space                                                                                                                                                |
| 0.759    | 0.724    | 19       | 19       | *        | -        | 0.7415   | 0.024749 | -          | GO:000695  | -          | GO:0034364//high-density lipoprotein particle                                                                                                                                  |
| 0.774    | 0.751    | 11       | 11       | *        | *        | 0.7625   | 0.016263 | K04525 1 1 | GO:001095  | GO:000486  | GO:0005615//extracellular space                                                                                                                                                |
| 0.744    | 0.707    | 10       | 10       | *        | *        | 0.7255   | 0.026163 | K03989 1 9 | GO:0004508 | -          | GO:0005576//extracellular region;GO:0005886//plasma membrane                                                                                                                   |
| 0.359    | 0.325    | 32       | 32       | *        | *        | 0.342    | 0.024042 | K14480 1 0 | GO:001983  | GO:000828  | GO:0031224//intrinsic to membrane;GO:0034364//high-density lipoprotein particle;GO:0034365//discoidal high-density lipoprotein particle                                        |
| 0.504    | 0.562    | 21       | 22       | *        | -        | 0.533    | 0.041012 | K07605 1 0 | GO:000697  | GO:000487  | GO:0045095//keratin filament;GO:0005886//plasma membrane                                                                                                                       |
| 0.473    | 0.441    | 33       | 33       | *        | *        | 0.457    | 0.022627 | K03912 1 0 | GO:000693  | GO:000486  | GO:0005576//extracellular region                                                                                                                                               |
| 0.678    | 0.645    | 34       | 34       | *        | *        | 0.6615   | 0.023335 | K05768 1 0 | GO:005159  | GO:000550  | GO:0030027//lamellipodium;GO:0015629//actin cytoskeleton;GO:0005615//extracellular space                                                                                       |
| 0.627    | 0.636    | 5        | 5        | *        | *        | 0.6315   | 0.006364 | K06840 1 0 | GO:004884  | GO:000487  | GO:0005615//extracellular space;GO:0016020//membrane                                                                                                                           |
| 0.813    | 0.694    | 7        | 7        | *        | -        | 0.7535   | 0.084146 | K01446 1 0 | GO:000382  | GO:000827  | GO:0005622//intracellular;GO:0005576//extracellular region;GO:0016020//membrane                                                                                                |
| 0.451    | 0.452    | 9        | 9        | -        | *        | 0.4515   | 0.000707 | K09644 1 0 | GO:003016  | GO:000425  | GO:0031093//platelet alpha granule lumen;GO:0034358//plasma lipoprotein particle;GO:0005576//extracellular region                                                              |
| 0.438    | 0.444    | 21       | 21       | *        | *        | 0.441    | 0.004243 | K08761 1 0 | GO:001018  | GO:000828  | GO:0005576//extracellular space                                                                                                                                                |
| 0.68     | 0.474    | 4        | 4        | *        | *        | 0.577    | 0.145664 | K06260 1 0 | GO:000716  | GO:000551  | GO:0005887//integral to plasma membrane;GO:0009986//cell surface                                                                                                               |
| 0.94     | 0.815    | 18       | 18       | -        | *        | 0.8775   | 0.088388 | K03983 1 0 | GO:000203  | GO:000428  | GO:0005577//fibrinogen complex;GO:0031093//platelet alpha granule lumen                                                                                                        |
| 0.603    | 0.615    | 10       | 10       | *        | *        | 0.609    | 0.008485 | K08758 1 2 | GO:000609  | GO:000486  | GO:0042627//chylomicron;GO:0005788//endoplasmic reticulum lumen;GO:0034361//very-low-density lipoprotein particle                                                              |
| 0.857    | 0.825    | 11       | 11       | -        | *        | 0.841    | 0.022627 | K09821 1 0 | GO:004816  | GO:000808  | GO:0005615//extracellular space;GO:0044444//cytoplasmic part                                                                                                                   |
| 0.797    | 0.895    | 5        | 5        | *        | -        | 0.846    | 0.069296 | -          | GO:000268  | GO:000551  | GO:0005615//extracellular space                                                                                                                                                |
| 0.397    | 0.395    | 519      | 519      | *        | -        | 0.396    | 0.001414 | K14462 1 0 | GO:001088  | GO:0005075 | GO:0030669//clathrin-coated endocytic vesicle membrane;GO:0034360//chylomicron;GO:0034362//low-density lipoprotein particle                                                    |
| 0.835    | 0.757    | 12       | 12       | -        | *        | 0.796    | 0.055154 | K03989 1 1 | GO:003016  | GO:000510  | GO:0031093//platelet alpha granule lumen;GO:0005615//extracellular space;GO:0005576//extracellular region                                                                      |
| 0.695    | 0.696    | 3        | 4        | *        | -        | 0.6955   | 0.000707 | K06251 1 3 | GO:000695  | GO:003024  | GO:0005576//extracellular region;GO:0016021//integral to membrane                                                                                                              |
| 0.708    | 0.668    | 15       | 14       | *        | *        | 0.688    | 0.028284 | -          | GO:000662  | GO:000531  | GO:0034364//high-density lipoprotein particle;GO:0034361//very-low-density lipoprotein particle                                                                                |
| 0.468    | 0.416    | 7        | 7        | *        | *        | 0.442    | 0.036777 | K14462 1 0 | GO:001088  | GO:0005075 | GO:0030669//clathrin-coated endocytic vesicle membrane;GO:0034360//chylomicron;GO:0034362//low-density lipoprotein particle                                                    |
| 0.535    | 0.454    | 3        | 3        | *        | *        | 0.4945   | 0.057276 | -          | GO:002241  | GO:000487  | GO:0005789//endoplasmic reticulum membrane;GO:0005886//plasma membrane;GO:0005576//extracellular space                                                                         |
| 1.748    | 1.988    | 6        | 6        | *        | *        | 1.868    | 0.169706 | K10789 1 0 | GO:000695  | GO:000487  | GO:0005764//lysosome;GO:0030141//secretory granule;GO:0005615//extracellular space                                                                                             |
| 2.168    | 1.75     | 7        | 7        | *        | *        | 1.959    | 0.295571 | K03989 1 3 | GO:000695  | GO:000486  | GO:0005615//extracellular space;GO:0005886//plasma membrane                                                                                                                    |
| 2.859    | 2.981    | 14       | 14       | *        | *        | 2.92     | 0.086267 | K10104 1 7 | GO:000822  | GO:000382  | GO:0005615//extracellular space;GO:0005581//collagen                                                                                                                           |
| 1.18     | 1.258    | 48       | 48       | *        | *        | 1.219    | 0.055154 | K10104 1 2 | GO:000716  | GO:003024  | GO:0005615//extracellular space;GO:0005581//collagen                                                                                                                           |
| 1.515    | 1.089    | 8        | 8        | *        | -        | 1.302    | 0.301227 | K00134 1 3 | GO:005140  | GO:005128  | GO:0005829//cytosol;GO:0015630//microtubule cytoskeleton;GO:0048471//perinuclear region of cytoplasm                                                                           |
| 1.512    | 1.505    | 7        | 7        | *        | *        | 1.5085   | 0.00495  | K13915 1 5 | GO:004274  | GO:000379  | GO:0005615//extracellular space                                                                                                                                                |
| 2.028    | 1.684    | 4        | 4        | *        | *        | 1.856    | 0.243245 | -          | GO:000609  | GO:003463  | GO:0005615//extracellular space                                                                                                                                                |
| 2.479    | 2.434    | 26       | 26       | *        | *        | 2.4565   | 0.03182  | K14736 1 0 | GO:004274  | GO:000819  | GO:0030141//secretory granule;GO:0097013//phagocytic vesicle lumen;GO:0005576//extracellular space                                                                             |
| 1.233    | 1.352    | 4        | 4        | -        | *        | 1.2925   | 0.084146 | K04004 1 8 | GO:000686  | GO:000531  | GO:0005615//extracellular space                                                                                                                                                |
| 1.209    | 1.279    | 3        | 3        | -        | *        | 1.244    | 0.049497 | K07374 1 0 | GO:005108  | GO:001990  | GO:0030496//midbody;GO:0005881//cytoplasmic microtubule                                                                                                                        |
| 1.218    | 1.098    | 2        | 2        | *        | -        | 1.158    | 0.084853 | K03996 1 0 | GO:000695  | -          | GO:0005579//membrane attack complex;GO:0005576//extracellular region                                                                                                           |
| 1.343    | 1.296    | 10       | 10       | *        | -        | 1.3195   | 0.033234 | K04004 1 6 | GO:004508  | -          | GO:0005615//extracellular space                                                                                                                                                |
| 1.378    | 1.211    | 9        | 9        | *        | *        | 1.2945   | 0.118087 | K09025 1 0 | GO:004572  | GO:0005075 | GO:0042627//chylomicron;GO:0034361//very-low-density lipoprotein particle;GO:0034362//low-density lipoprotein particle                                                         |
| 1.427    | 1.471    | 4        | 4        | *        | *        | 1.449    | 0.031113 | K07964 1 0 | GO:003369  | GO:000456  | GO:0045121//membrane raft;GO:0005765//lysosomal membrane;GO:0005576//extracellular space                                                                                       |
| 1.193    | 1.208    | 16       | 16       | -        | *        | 1.2005   | 0.010607 | K04550 1 0 | GO:004295  | GO:000504  | GO:0005905//coated pit;GO:0030425//dendrite;GO:0043025//neuronal cell body;GO:0005576//extracellular space                                                                     |
| 1.28     | 1.223    | 18       | 18       | -        | *        | 1.2515   | 0.040305 | -          | GO:004306  | GO:000486  | GO:0005886//plasma membrane;GO:0031093//platelet alpha granule lumen;GO:0005576//extracellular space                                                                           |
| 1.321    | 1.366    | 4        | 5        | *        | *        | 1.3435   | 0.03182  | K10104 1 0 | GO:000822  | GO:000382  | GO:0005615//extracellular space;GO:0005581//collagen                                                                                                                           |
| 1.346    | 1.158    | 6        | 6        | *        | *        | 1.252    | 0.132936 | K06554 1 4 | -          | -          | -                                                                                                                                                                              |
| 1.459    | 1.048    | 7        | 7        | *        | -        | 1.2535   | 0.290621 | -          | GO:003016  | GO:000166  | GO:0034364//high-density lipoprotein particle                                                                                                                                  |
| 1.216    | 1.033    | 10       | 10       | *        | -        | 1.1245   | 0.129401 | K03997 1 0 | GO:000695  | -          | GO:0005615//extracellular space;GO:0005579//membrane attack complex                                                                                                            |
| 1.206    | 1.336    | 7        | 6        | *        | *        | 1.271    | 0.091924 | K08023 1 1 | GO:001810  | GO:000550  | GO:0005615//extracellular space;GO:0005578//proteinaceous extracellular matrix                                                                                                 |
| 1.594    | 1.193    | 3        | 3        | *        | -        | 1.3935   | 0.28355  | K06554 1 1 | -          | -          | -                                                                                                                                                                              |
| 1.208    | 1.231    | 5        | 5        | *        | *        | 1.2195   | 0.016263 | -          | GO:000646  | GO:000486  | GO:0043234//protein complex;GO:0005576//extracellular region                                                                                                                   |
| 1.33     | 1.27     | 22       | 22       | *        | *        | 1.3      | 0.042426 | K05692 1 0 | GO:000741  | GO:001990  | GO:0030863//cortical cytoskeleton;GO:0031941//filamentous actin;GO:0005829//cytoskeleton                                                                                       |
| 1.178    | 1.254    | 2        | 2        | -        | *        | 1.216    | 0.05374  | K03986 1 3 | GO:004508  | GO:000551  | GO:0005602//complement component C1 complex;GO:0005581//collagen                                                                                                               |
| 1.336    | 1.124    | 8        | 8        | *        | -        | 1.23     | 0.149907 | K08136 1 2 | GO:000716  | GO:000550  | GO:0005615//extracellular space;GO:0005578//proteinaceous extracellular matrix                                                                                                 |
| 1.202    | 1.129    | 45       | 45       | *        | -        | 1.1655   | 0.051619 | K07127 1 1 | -          | GO:000551  | GO:0005576//extracellular region                                                                                                                                               |
| 1.072    | 1.227    | 8        | 8        | -        | *        | 1.1495   | 0.109602 | K04004 1 0 | GO:000695  | -          | GO:0005615//extracellular space                                                                                                                                                |
| 1.362    | 1.527    | 4        | 4        | *        | *        | 1.4445   | 0.116673 | K03992 1 0 | GO:000650  | GO:000550  | GO:0005615//extracellular space                                                                                                                                                |
| 1.539    | 1.112    | 3        | 3        | *        | -        | 1.3255   | 0.301935 | -          | GO:007127  | GO:000551  | GO:0031045//dense core granule;GO:0043196//varicosity;GO:0043679//axon terminus                                                                                                |
| 1.306    | 1.34     | 9        | 9        | -        | *        | 1.323    | 0.024042 | K03992 1 0 | GO:000650  | GO:000550  | GO:0005615//extracellular space                                                                                                                                                |
